# Supplementary material for: Spatial climate dynamics in the Iberian Peninsula since 15 000 yr BP
Source: Copernicus journal article supplement (doi:10.5194/cp-12-1137-2016), 2016-05-11
Supplement: Supplementary file 2 [file cp-12-1137-2016-supplement.zip]

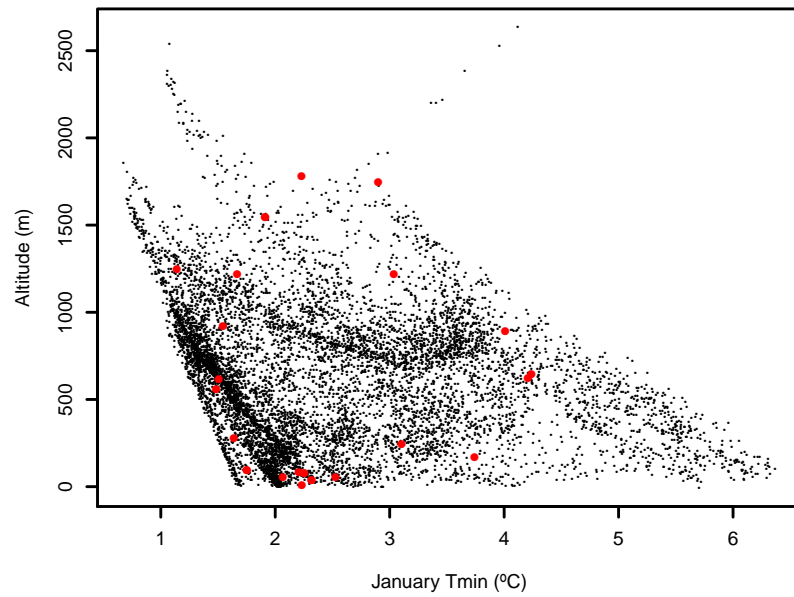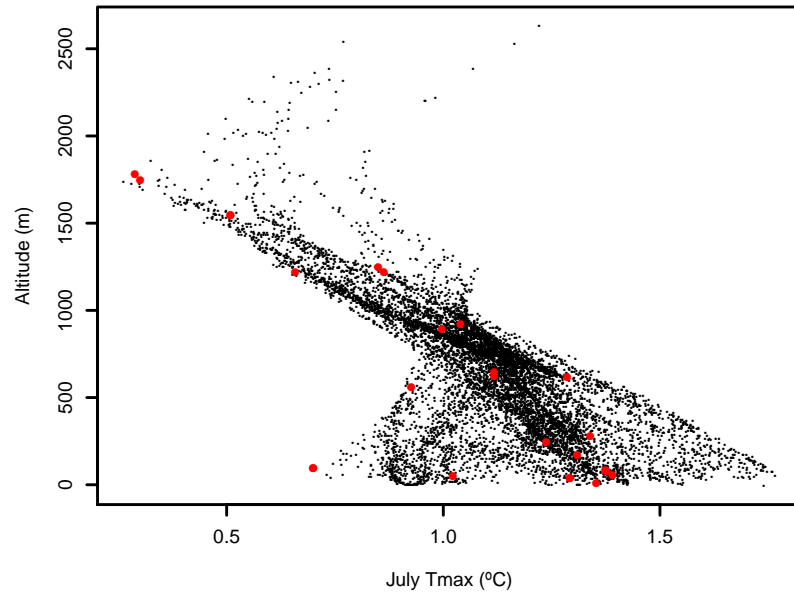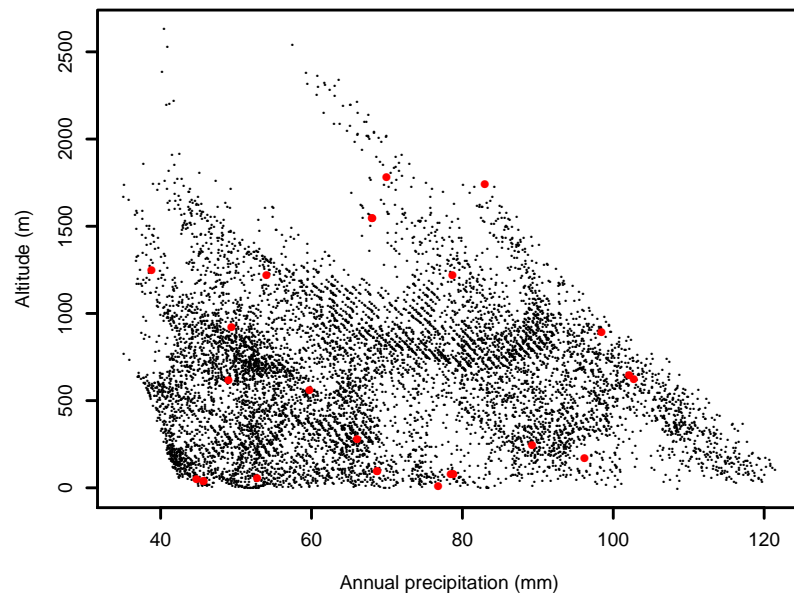

Relation between stability and altitude for each reconstructed variable. Black dots are extracted from the interpolated grid and red dots are the value at pollen sites.
