# Supplementary material for: Spatial climate dynamics in the Iberian Peninsula since 15 000 yr BP
Source: Copernicus journal article supplement (doi:10.5194/cp-12-1137-2016), 2016-05-11
Supplement: Supplementary file 3 [file cp-12-1137-2016-supplement.zip]

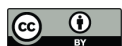

## *Supplement of*

# **Spatial climate dynamics in the Iberian Peninsula since 15 000 yr BP**

**Pedro Tarroso et al.**

*Correspondence to:* Pedro Tarroso (ptarroso@cibio.up.pt)

- cp-12-1137-2016-supplement-title-page.pdf
- DataS7.zip
- FigS1.pdf
- FigS2.pdf
- FigS3.pdf
- FigS4.pdf
- FigS5.pdf
- FigS6.pdf
- TableS1.pdf

The copyright of individual parts of the supplement might differ from the CC-BY 3.0 licence.
