# Supplementary material for: Spatial climate dynamics in the Iberian Peninsula since 15 000 yr BP
Source: Copernicus journal article supplement (doi:10.5194/cp-12-1137-2016), 2016-05-11
Supplement: Supplementary file 4 [file cp-12-1137-2016-supplement.zip]

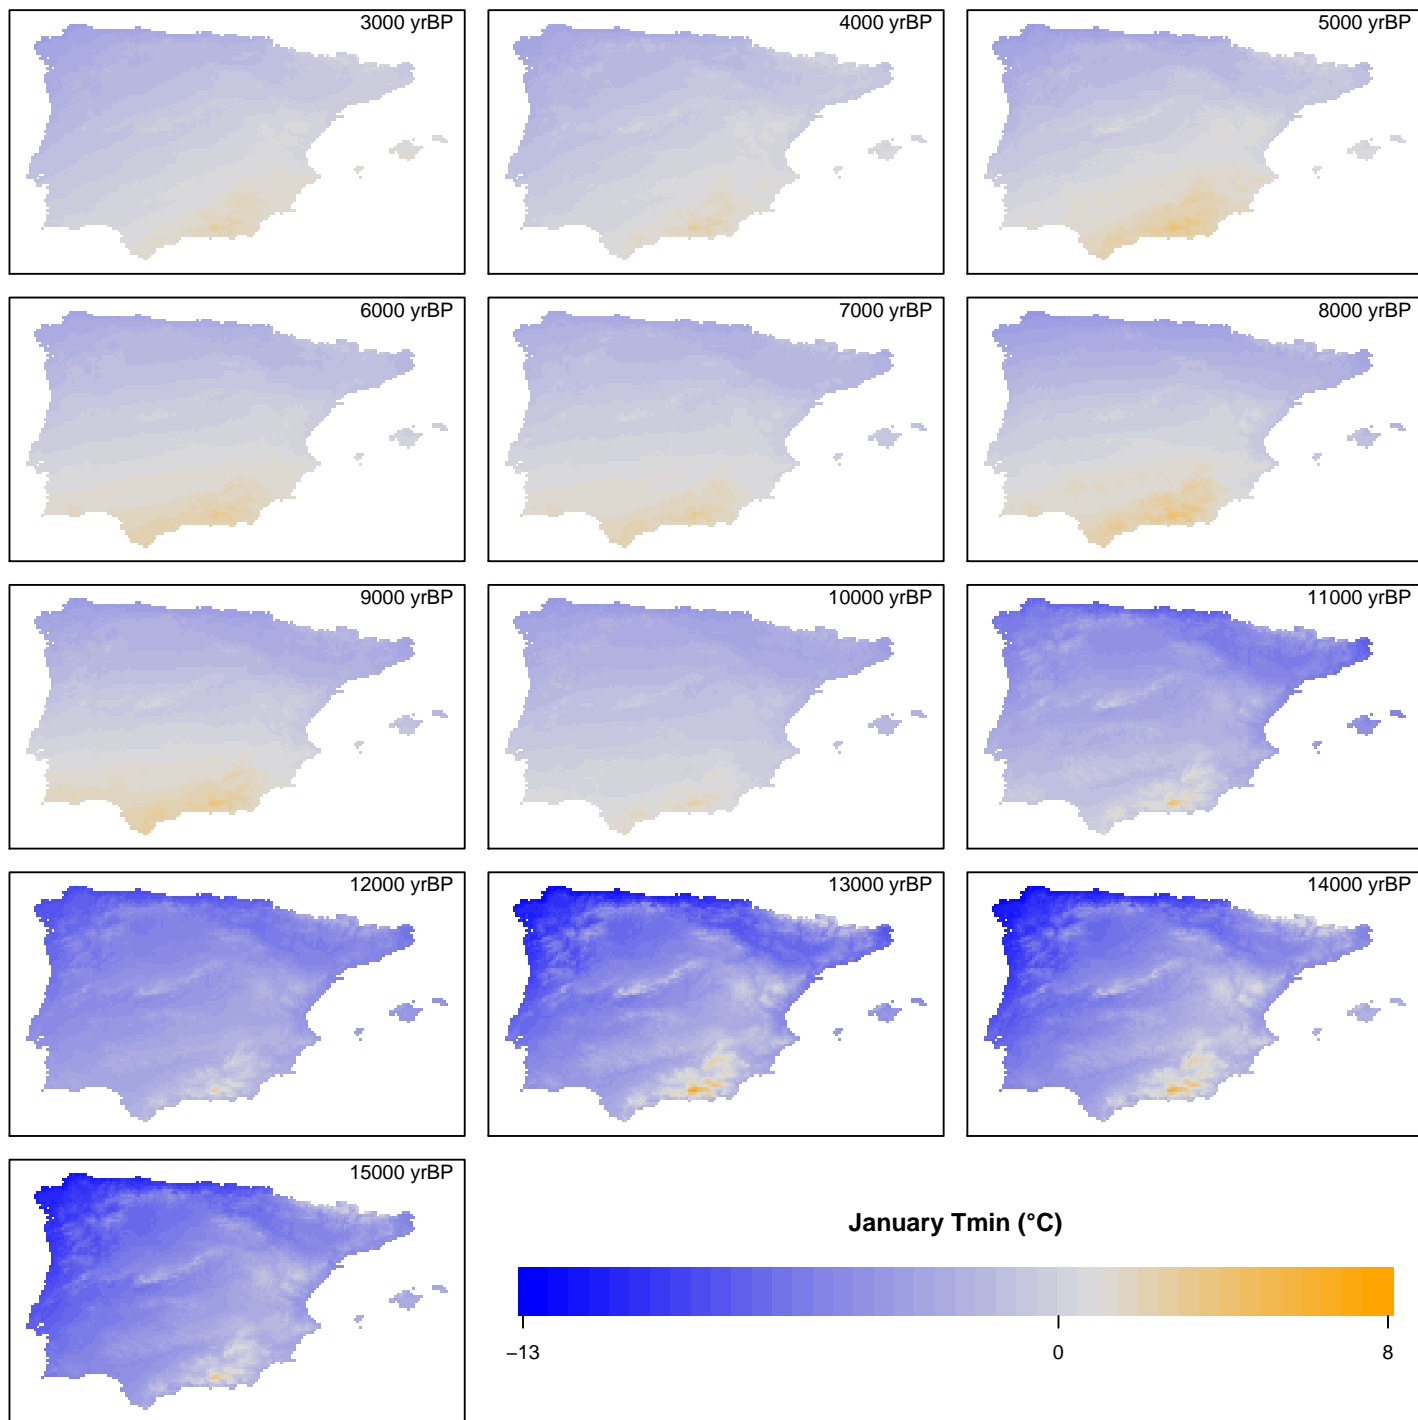

Climate anomalies maps for Minimum Temperature of January (T<sub>jan</sub>).

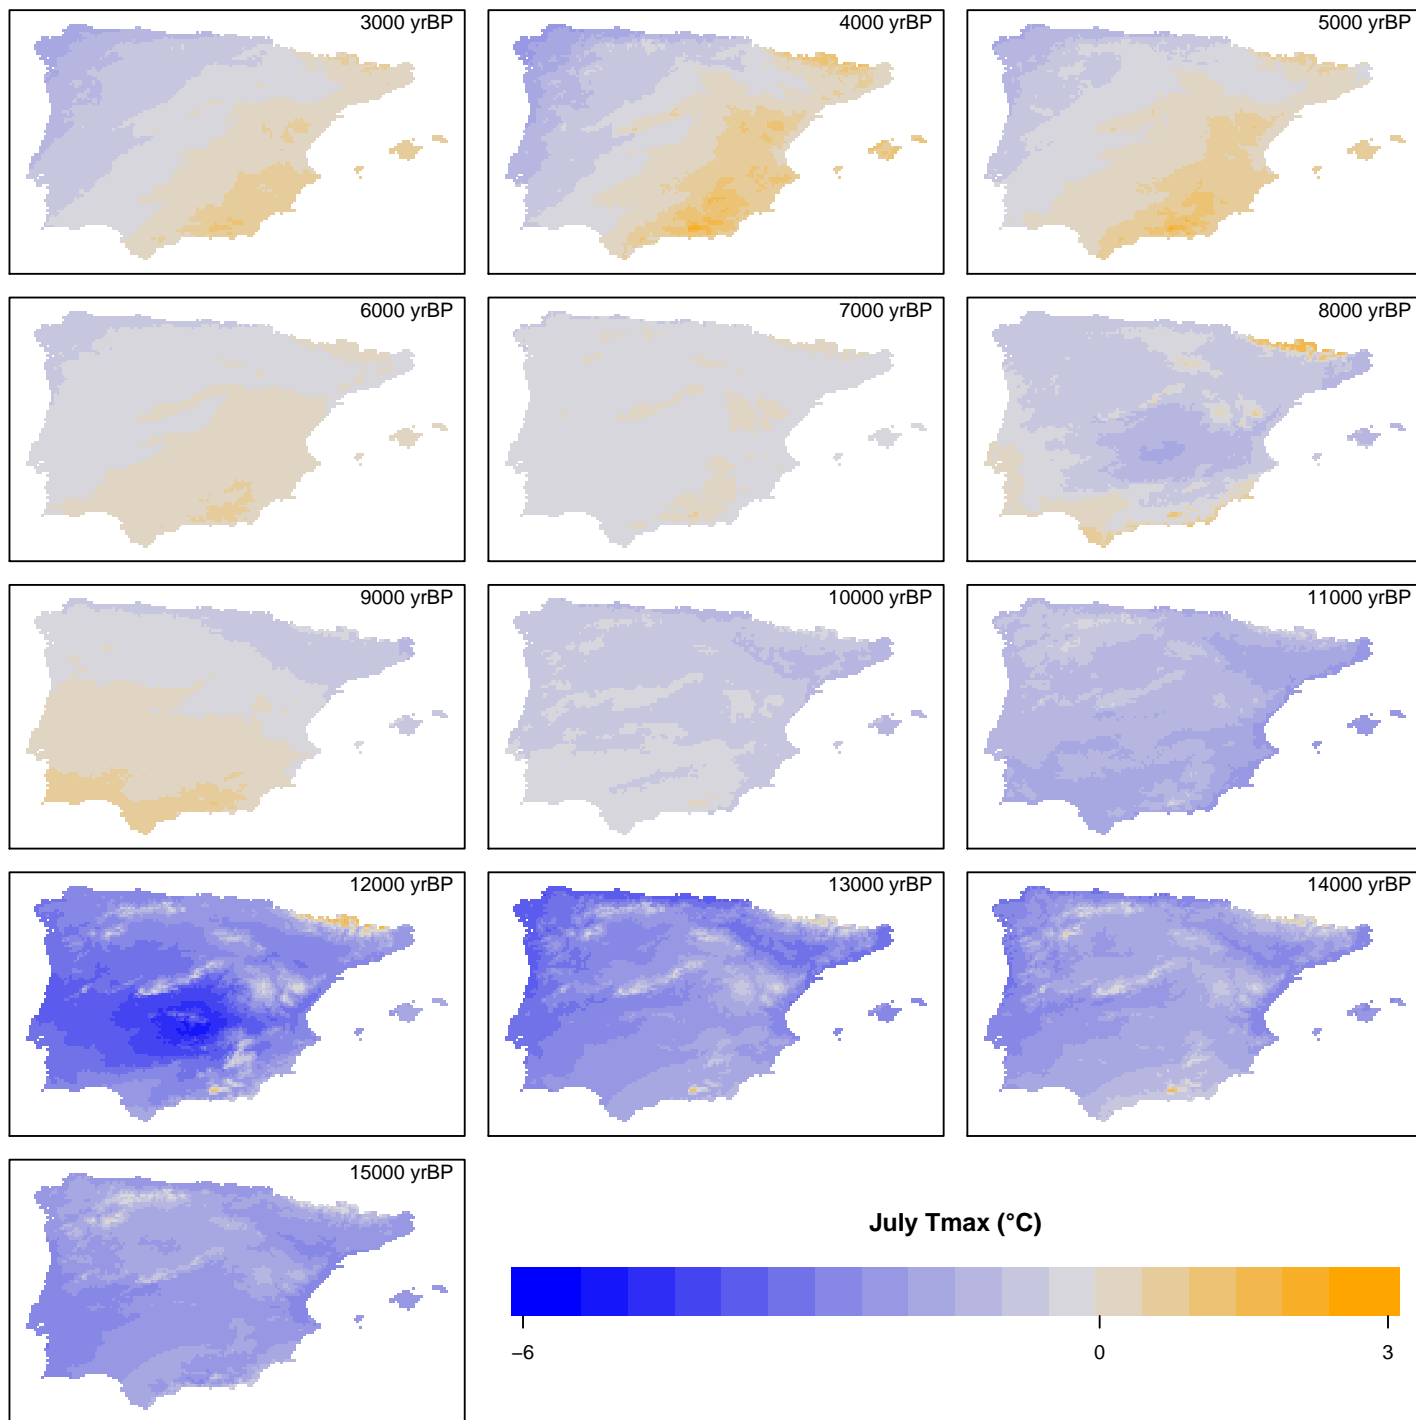

Climate anomalies maps for Maximum Temperature of July (T<sub>jul</sub>).

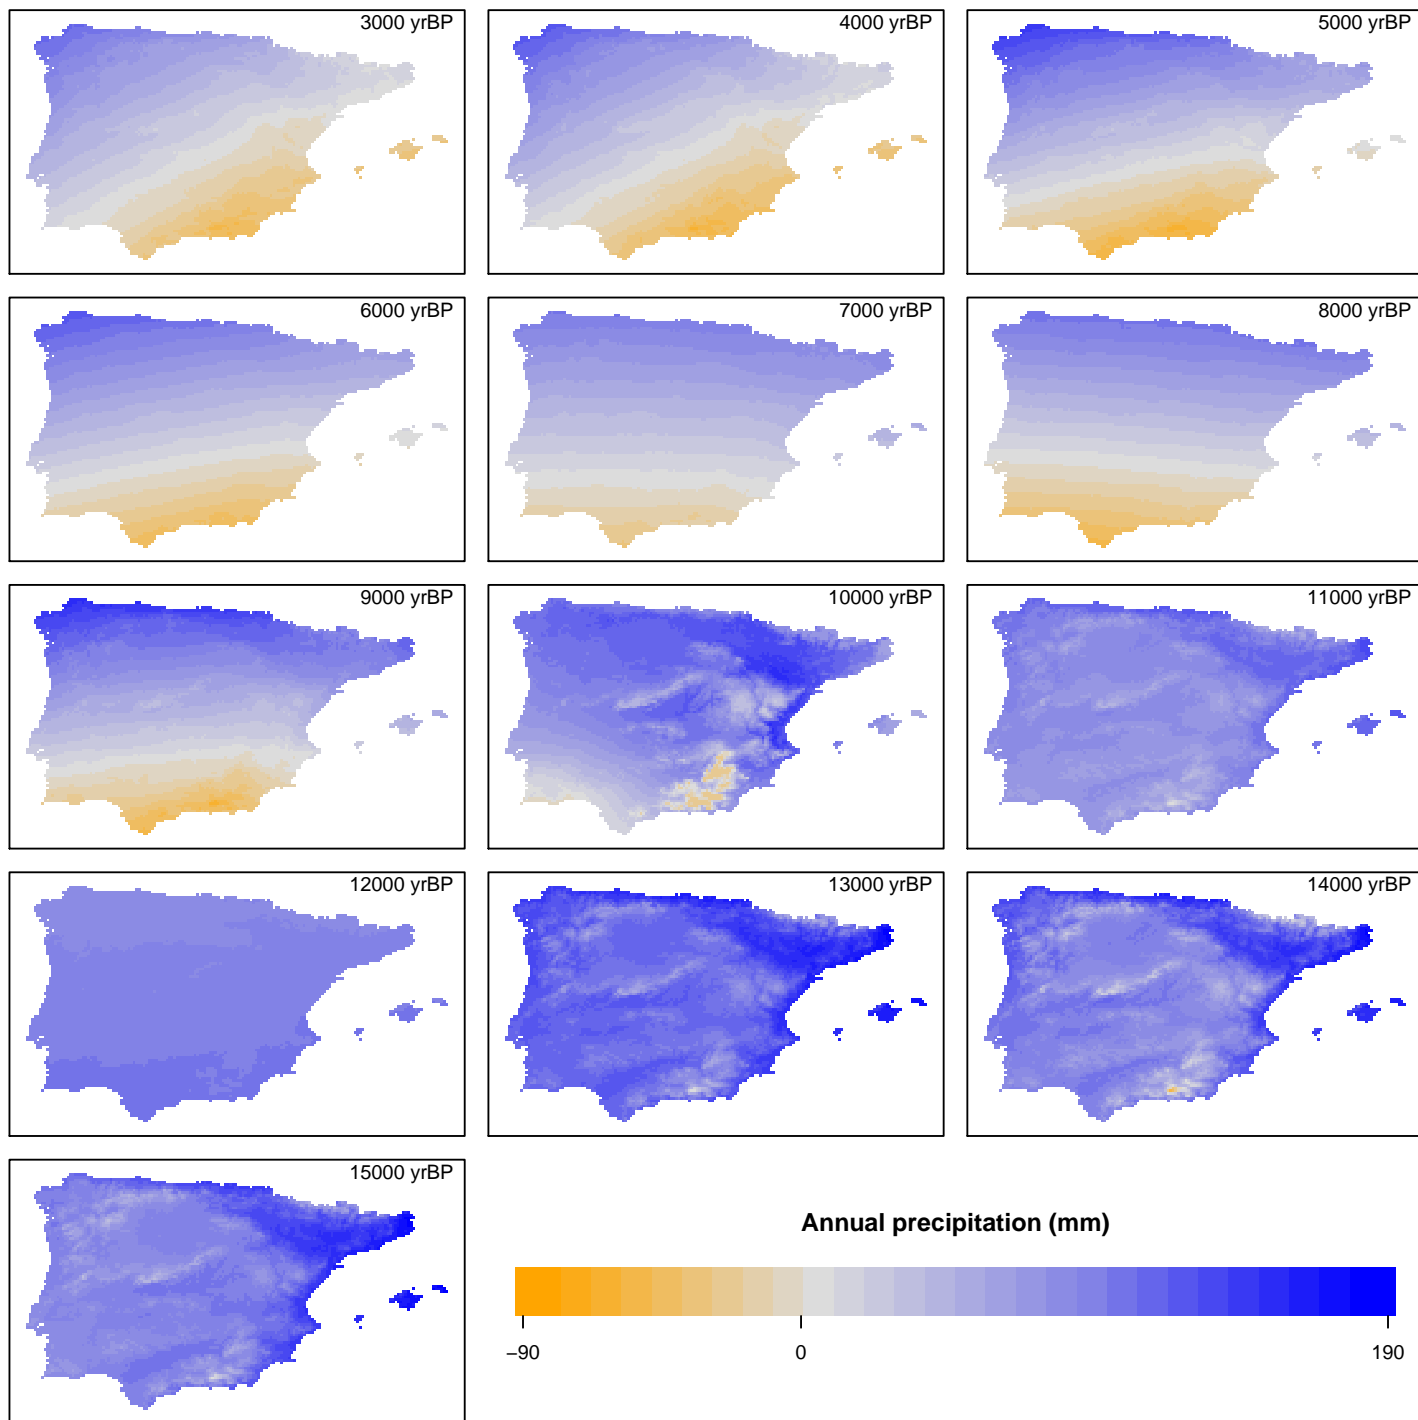

Climate anomalies maps for Annual Precipitation (Aprc).
