# Supplementary material for: Spatial climate dynamics in the Iberian Peninsula since 15 000 yr BP
Source: Copernicus journal article supplement (doi:10.5194/cp-12-1137-2016), 2016-05-11
Supplement: Supplementary file 5 [file cp-12-1137-2016-supplement.zip]

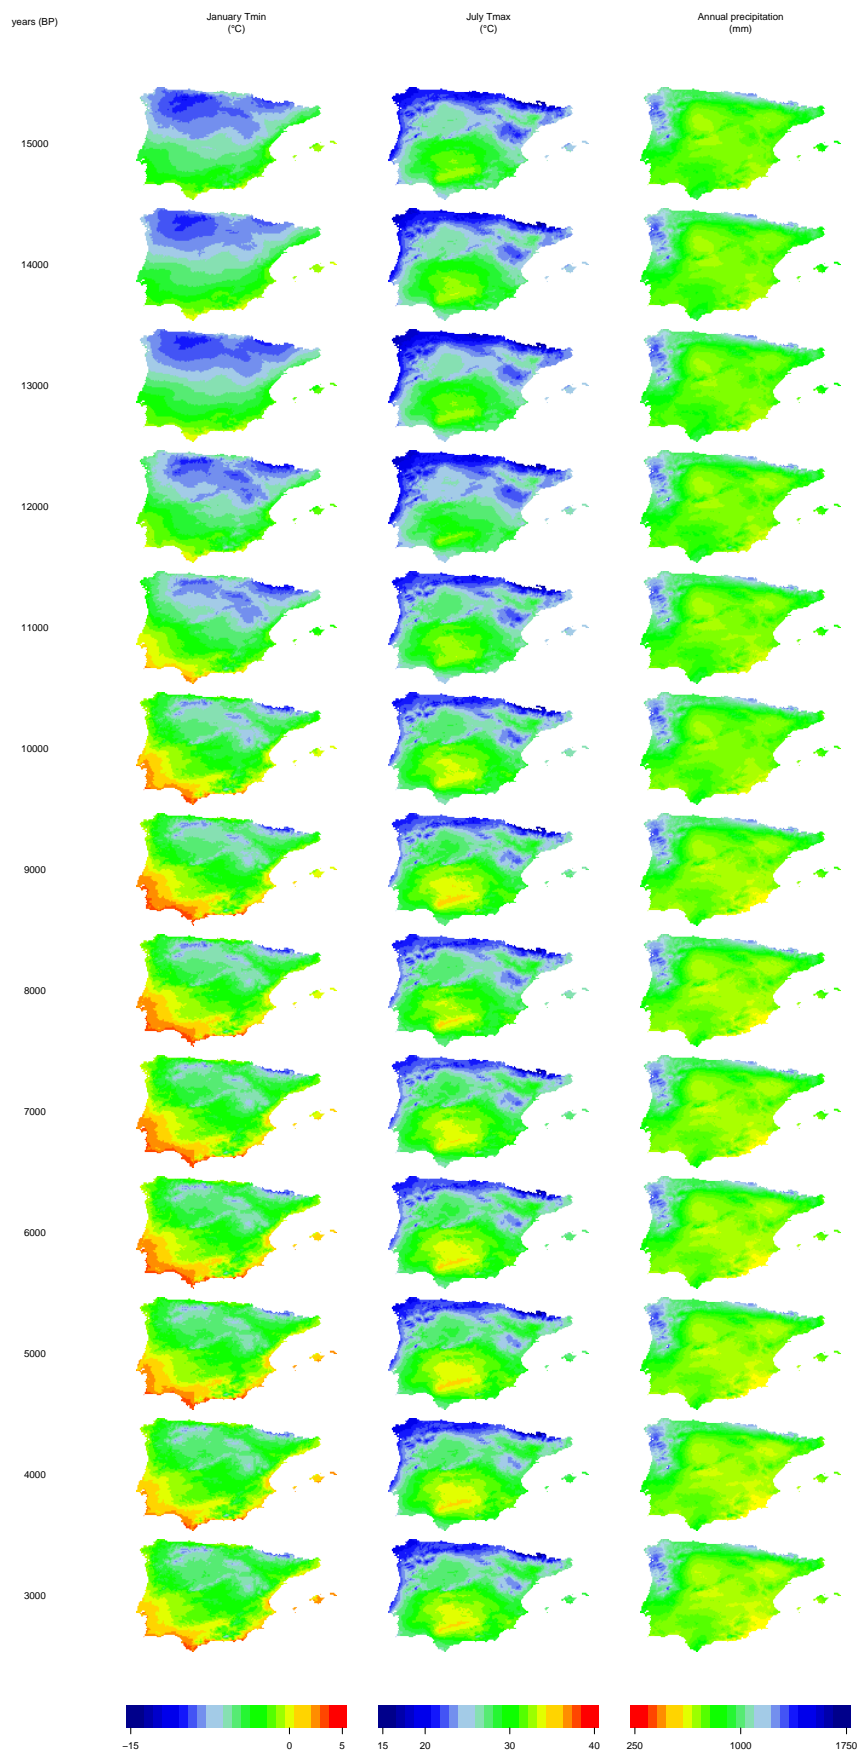

Spatial interpolation of the reconstructed climate variables in the Iberian Peninsula and the Balearic Islands.
