# Supplementary material for: Spatial climate dynamics in the Iberian Peninsula since 15 000 yr BP
Source: Copernicus journal article supplement (doi:10.5194/cp-12-1137-2016), 2016-05-11
Supplement: Supplementary file 6 [file cp-12-1137-2016-supplement.zip]

Archive with 9 entries (9 files):
- cp-12-1137-2016-supplement-title-page.pdf
- FigS1.pdf
- FigS6.pdf
- FigS3.pdf
- FigS4.pdf
- FigS2.pdf
- TableS1.pdf
- FigS5.pdf
- DataS7.zip
