# Supplementary material for: Spatial climate dynamics in the Iberian Peninsula since 15 000 yr BP
Source: Copernicus journal article supplement (doi:10.5194/cp-12-1137-2016), 2016-05-11
Supplement: Supplementary file 6 [file cp-12-1137-2016-supplement.zip › FigS1.pdf]

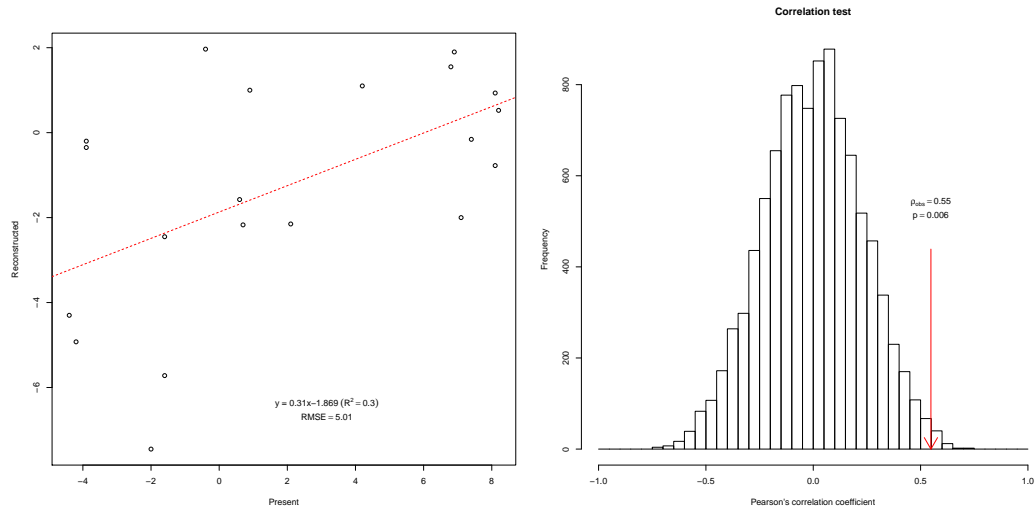

(a) Tjan

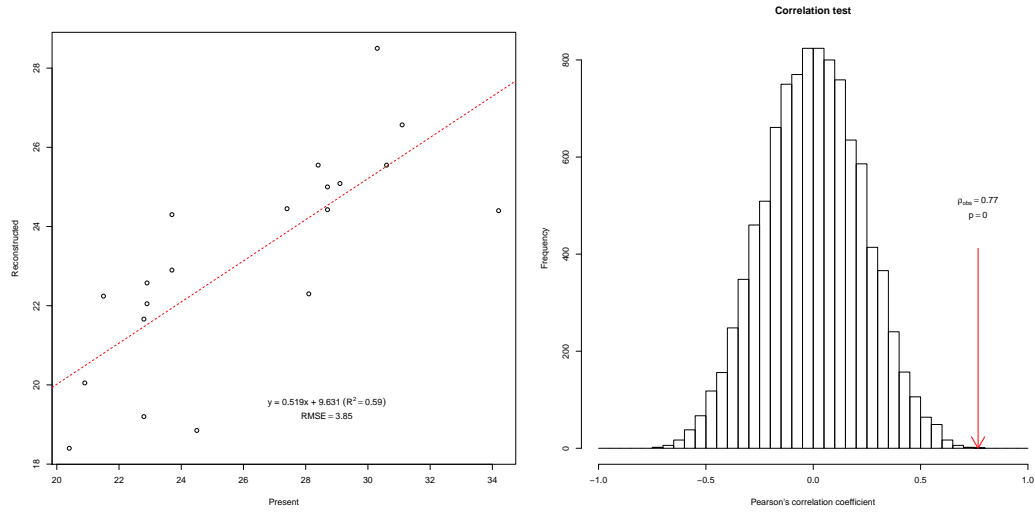

(b) Tjul

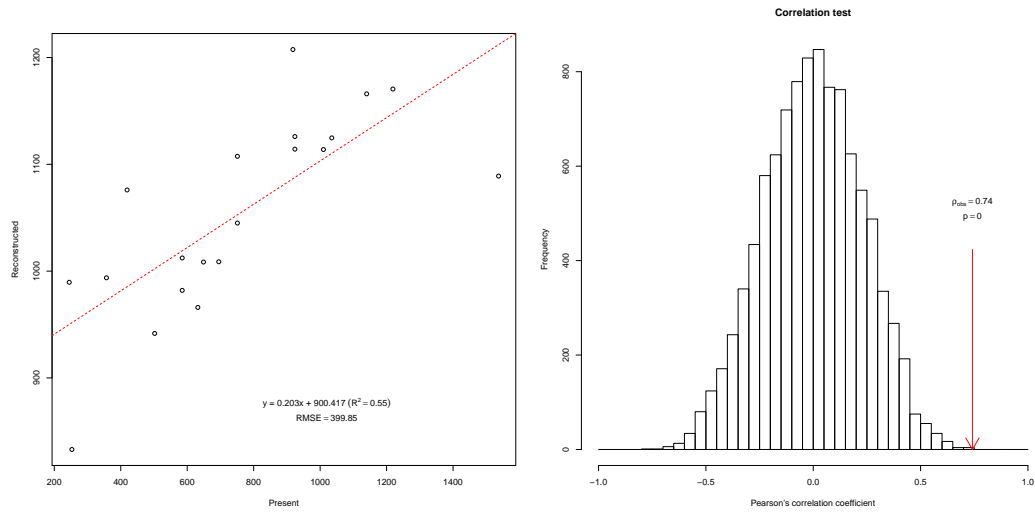

(c) Pann

Linear regression of the reconstructed climate and the historic (1950-2000) data for the a) minimum temperature of January (Tjan), b) maximum temperature of July (Tjul), and c) annual precipitation (Pann). On the left plot is shown the relation between the historic climate and the averaged reconstructed values for samples available within the last 500 years for each site. The equation of the linear regression and coefficient of determination are shown within the plot. The Root Mean Square Error (RMSE) of the reconstruction is also shown (the error is calculated with the squared differences between historic and reconstructed data sets and not the residuals from the regression). A set of 999 random replicates were performed to test the significance of the Pearson's correlation between the reconstructed variable and the historic data set (right plot). The histogram shows the distribution of the correlation scores after randomizing the reconstructed variable and the red arrow indicates the observed correlation value with the respective probability.
