# Supplementary material for: Spatial climate dynamics in the Iberian Peninsula since 15 000 yr BP
Source: Copernicus journal article supplement (doi:10.5194/cp-12-1137-2016), 2016-05-11
Supplement: Supplementary file 6 [file cp-12-1137-2016-supplement.zip › FigS2.pdf]

The uncertainty related to the climate reconstruction is shown for the minimum January temperature (Tjan), maximum July temperature (Tjul) and annual precipitation (Pann). The standard error is calculated from the range of the 95% confidence interval as  $range/3.92$  (assuming a normal distribution). The boxplots show the overall variation of the reconstruction uncertainty per age using all available sites. The raw values used to generate the plots are given for the Tjan (Table 1), Tjul (Table 2) and Pann (Table 3).

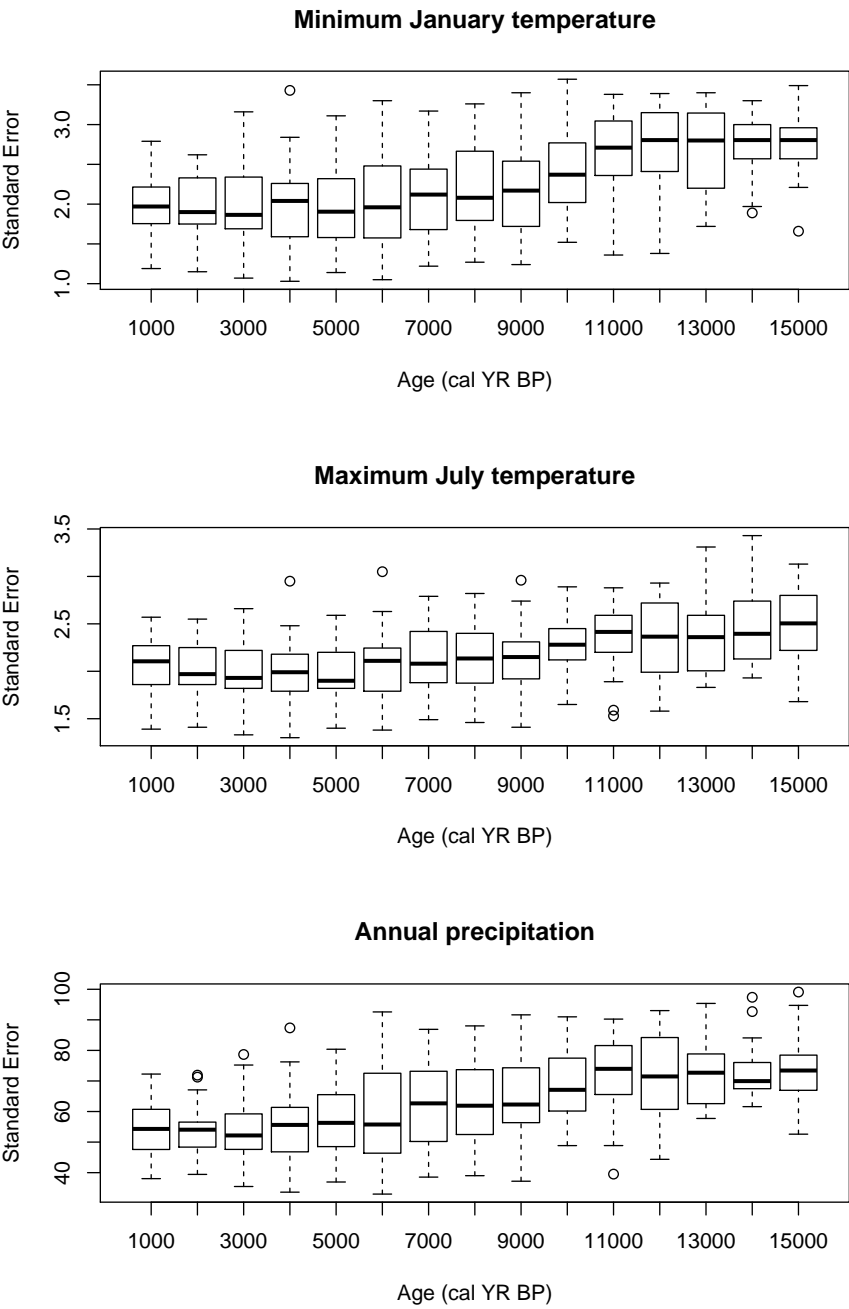

Table 1: Minimum January temperature

| site                   | age  | value | lower  | upper | range | se   |
|------------------------|------|-------|--------|-------|-------|------|
| Albufera Alcudia       | 1000 | 2.07  | -1.45  | 5.34  | 6.79  | 1.73 |
| Algendar               | 1000 | 2.22  | -1.97  | 5.87  | 7.84  | 2.00 |
| Antas                  | 1000 | 2.44  | -0.21  | 5.08  | 5.29  | 1.35 |
| Barbaroxa              | 1000 | 0.21  | -3.21  | 3.36  | 6.57  | 1.68 |
| Cala Galdana           | 1000 | 2.66  | -1.87  | 5.66  | 7.53  | 1.92 |
| cc17                   | 1000 | 0.87  | -3.25  | 4.69  | 7.94  | 2.03 |
| Charco da Candieira    | 1000 | -0.46 | -4.39  | 2.60  | 6.99  | 1.78 |
| Gador                  | 1000 | 0.44  | -1.80  | 2.86  | 4.66  | 1.19 |
| Golfo                  | 1000 | 1.37  | -1.25  | 3.78  | 5.03  | 1.28 |
| Lago de Ajo            | 1000 | -5.64 | -10.50 | -1.10 | 9.40  | 2.40 |
| Laguna de la Roya      | 1000 | -5.92 | -11.06 | -0.14 | 10.92 | 2.79 |
| Lake Racou             | 1000 | -2.26 | -6.57  | 1.89  | 8.46  | 2.16 |
| Las Pardillas Lake     | 1000 | -1.11 | -5.00  | 2.30  | 7.30  | 1.86 |
| Puerto de Belate       | 1000 | -3.56 | -7.20  | -0.13 | 7.07  | 1.80 |
| Puerto de Los Tornos   | 1000 | -2.89 | -6.55  | 0.52  | 7.07  | 1.80 |
| Quintanar de la Sierra | 1000 | -0.06 | -3.98  | 3.74  | 7.72  | 1.97 |
| Saldropo               | 1000 | -2.27 | -6.29  | 1.59  | 7.88  | 2.01 |
| Sanabria Marsh         | 1000 | -4.50 | -9.53  | 0.14  | 9.67  | 2.47 |
| San Rafael             | 1000 | -1.03 | -5.05  | 2.69  | 7.74  | 1.97 |
| Santo Andre            | 1000 | -2.07 | -6.50  | 1.78  | 8.28  | 2.11 |
| Siles                  | 1000 | 2.13  | -0.67  | 4.77  | 5.44  | 1.39 |
| Lourdes                | 1000 | -4.43 | -9.03  | 0.09  | 9.12  | 2.33 |
| Monge                  | 1000 | -5.09 | -9.67  | -0.11 | 9.56  | 2.44 |
| Banyoles               | 1000 | -2.08 | -6.72  | 2.17  | 8.89  | 2.27 |
| Albufera Alcudia       | 2000 | 1.37  | -2.68  | 4.49  | 7.17  | 1.83 |
| Algendar               | 2000 | 0.81  | -2.67  | 3.94  | 6.61  | 1.69 |
| Antas                  | 2000 | 2.43  | -0.37  | 5.48  | 5.85  | 1.49 |
| Barbaroxa              | 2000 | 0.22  | -2.82  | 3.25  | 6.07  | 1.55 |
| Cala Galdana           | 2000 | 0.42  | -3.15  | 3.87  | 7.02  | 1.79 |
| cc17                   | 2000 | 1.03  | -3.31  | 4.17  | 7.48  | 1.91 |
| Charco da Candieira    | 2000 | -4.19 | -8.49  | -0.30 | 8.19  | 2.09 |
| Gador                  | 2000 | 2.99  | 0.53   | 5.05  | 4.52  | 1.15 |
| Golfo                  | 2000 | 1.07  | -1.49  | 3.49  | 4.98  | 1.27 |
| Lago de Ajo            | 2000 | -6.30 | -11.15 | -1.55 | 9.60  | 2.45 |
| Laguna de la Roya      | 2000 | -6.02 | -11.03 | -0.74 | 10.29 | 2.62 |
| Lake Racou             | 2000 | -3.09 | -7.90  | 0.79  | 8.69  | 2.22 |
| Las Pardillas Lake     | 2000 | -2.31 | -6.11  | 1.33  | 7.44  | 1.90 |
| Puerto de Belate       | 2000 | -3.17 | -6.93  | 0.24  | 7.17  | 1.83 |
| Puerto de Los Tornos   | 2000 | -2.26 | -5.95  | 1.00  | 6.95  | 1.77 |
| Quintanar de la Sierra | 2000 | -3.48 | -7.63  | 0.32  | 7.95  | 2.03 |

Table 1: *(continued)*

| site                   | age  | value | lower  | upper | range | se   |
|------------------------|------|-------|--------|-------|-------|------|
| Roquetas de Mar        | 2000 | -0.01 | -5.01  | 4.31  | 9.32  | 2.38 |
| Saldropo               | 2000 | -2.31 | -5.96  | 1.35  | 7.31  | 1.86 |
| Sanabria Marsh         | 2000 | -4.39 | -9.77  | 0.29  | 10.06 | 2.57 |
| San Rafael             | 2000 | -1.66 | -6.25  | 2.87  | 9.12  | 2.33 |
| Santo Andre            | 2000 | -1.00 | -4.83  | 2.04  | 6.87  | 1.75 |
| Siles                  | 2000 | 2.19  | -0.69  | 4.78  | 5.47  | 1.40 |
| Lourdes                | 2000 | -5.88 | -10.46 | -1.53 | 8.93  | 2.28 |
| Monge                  | 2000 | -4.46 | -9.43  | 0.27  | 9.70  | 2.47 |
| Banyoles               | 2000 | -2.67 | -8.45  | 1.59  | 10.04 | 2.56 |
| Albufera Alcudia       | 3000 | 1.21  | -2.04  | 4.17  | 6.21  | 1.58 |
| Algendar               | 3000 | 1.80  | -2.75  | 4.42  | 7.17  | 1.83 |
| Antas                  | 3000 | 2.76  | -0.62  | 6.02  | 6.64  | 1.69 |
| Barbaroxa              | 3000 | -1.83 | -5.47  | 1.88  | 7.35  | 1.88 |
| Cala Galdana           | 3000 | 0.17  | -3.11  | 3.11  | 6.22  | 1.59 |
| cc17                   | 3000 | 0.23  | -3.96  | 3.61  | 7.57  | 1.93 |
| Charco da Candieira    | 3000 | -3.88 | -8.05  | -0.23 | 7.82  | 1.99 |
| Gador                  | 3000 | 2.27  | -0.46  | 4.38  | 4.84  | 1.23 |
| Golfo                  | 3000 | 1.78  | -0.59  | 4.02  | 4.61  | 1.18 |
| Guadiana               | 3000 | 2.57  | 0.18   | 4.37  | 4.19  | 1.07 |
| Lago de Ajo            | 3000 | -5.92 | -11.01 | -1.41 | 9.60  | 2.45 |
| Laguna de la Roya      | 3000 | -6.09 | -11.86 | -0.97 | 10.89 | 2.78 |
| Lake Racou             | 3000 | -2.79 | -6.70  | 1.22  | 7.92  | 2.02 |
| Las Pardillas Lake     | 3000 | -1.86 | -5.81  | 1.43  | 7.24  | 1.85 |
| Puerto de Belate       | 3000 | -2.63 | -6.11  | 0.93  | 7.04  | 1.80 |
| Puerto de Los Tornos   | 3000 | -2.84 | -6.17  | 0.96  | 7.13  | 1.82 |
| Quintanar de la Sierra | 3000 | -1.96 | -6.17  | 1.56  | 7.73  | 1.97 |
| Roquetas de Mar        | 3000 | 0.25  | -3.74  | 4.13  | 7.87  | 2.01 |
| Saldropo               | 3000 | -2.39 | -6.14  | 0.86  | 7.00  | 1.79 |
| Sanabria Marsh         | 3000 | -5.93 | -12.62 | -0.24 | 12.38 | 3.16 |
| San Rafael             | 3000 | -2.35 | -8.14  | 3.37  | 11.51 | 2.94 |
| Santo Andre            | 3000 | -0.61 | -4.57  | 2.54  | 7.11  | 1.81 |
| Siles                  | 3000 | 2.55  | -0.33  | 5.04  | 5.37  | 1.37 |
| Lourdes                | 3000 | -5.04 | -10.10 | -0.78 | 9.32  | 2.38 |
| Monge                  | 3000 | -5.59 | -10.77 | -1.56 | 9.21  | 2.35 |
| Banyoles               | 3000 | -1.36 | -6.40  | 2.76  | 9.16  | 2.34 |
| Albufera Alcudia       | 4000 | 0.68  | -2.61  | 3.63  | 6.24  | 1.59 |
| Algendar               | 4000 | 1.24  | -2.11  | 4.14  | 6.25  | 1.59 |
| Antas                  | 4000 | 1.95  | -1.87  | 6.29  | 8.16  | 2.08 |
| Barbaroxa              | 4000 | 0.45  | -2.93  | 3.40  | 6.33  | 1.61 |
| Cala Galdana           | 4000 | 1.69  | -1.41  | 4.69  | 6.10  | 1.56 |

Table 1: (*continued*)

| site                   | age  | value | lower  | upper | range | se   |
|------------------------|------|-------|--------|-------|-------|------|
| Cala n” Porter         | 4000 | 1.47  | −1.75  | 4.05  | 5.80  | 1.48 |
| cc17                   | 4000 | 1.18  | −3.31  | 4.48  | 7.79  | 1.99 |
| Charco da Candieira    | 4000 | −4.19 | −9.13  | 0.67  | 9.80  | 2.50 |
| Gador                  | 4000 | 2.38  | 0.16   | 4.90  | 4.74  | 1.21 |
| Golfo                  | 4000 | 1.92  | −0.37  | 4.00  | 4.37  | 1.11 |
| Guadiana               | 4000 | 3.16  | 1.21   | 5.25  | 4.04  | 1.03 |
| Lago de Ajo            | 4000 | −4.86 | −10.03 | −1.16 | 8.87  | 2.26 |
| Laguna de la Roya      | 4000 | −6.23 | −11.89 | −0.76 | 11.13 | 2.84 |
| Lake Racou             | 4000 | −2.77 | −6.89  | 1.22  | 8.11  | 2.07 |
| Las Pardillas Lake     | 4000 | −2.32 | −8.37  | 1.72  | 10.09 | 2.57 |
| Navarres 1             | 4000 | 0.41  | −4.44  | 4.04  | 8.48  | 2.16 |
| Puerto de Belate       | 4000 | −5.23 | −9.01  | −0.96 | 8.05  | 2.05 |
| Puerto de Los Tornos   | 4000 | −3.14 | −6.59  | 0.36  | 6.95  | 1.77 |
| Quintanar de la Sierra | 4000 | −1.56 | −6.33  | 2.60  | 8.93  | 2.28 |
| Roquetas de Mar        | 4000 | 0.25  | −3.96  | 3.97  | 7.93  | 2.02 |
| Saldropo               | 4000 | −2.19 | −5.72  | 1.69  | 7.41  | 1.89 |
| Sanabria Marsh         | 4000 | −4.01 | −9.63  | 1.07  | 10.70 | 2.73 |
| San Rafael             | 4000 | −5.47 | −12.18 | 1.25  | 13.43 | 3.43 |
| Santo Andre            | 4000 | −1.82 | −6.10  | 1.91  | 8.01  | 2.04 |
| Siles                  | 4000 | 1.91  | −1.37  | 4.52  | 5.89  | 1.50 |
| Lourdes                | 4000 | −5.68 | −9.97  | −1.49 | 8.48  | 2.16 |
| Monge                  | 4000 | −5.11 | −9.88  | −0.67 | 9.21  | 2.35 |
| Moura                  | 4000 | −3.08 | −6.84  | 0.61  | 7.45  | 1.90 |
| Banyoles               | 4000 | −1.73 | −6.12  | 2.66  | 8.78  | 2.24 |
| Albufera Alcudia       | 5000 | 0.16  | −3.26  | 2.89  | 6.15  | 1.57 |
| Algendar               | 5000 | 0.44  | −3.14  | 3.13  | 6.27  | 1.60 |
| Antas                  | 5000 | 1.69  | −2.61  | 6.50  | 9.11  | 2.32 |
| Barbaroxa              | 5000 | 0.54  | −2.88  | 3.66  | 6.54  | 1.67 |
| Cala Galdana           | 5000 | 1.25  | −2.41  | 3.79  | 6.20  | 1.58 |
| Cala n” Porter         | 5000 | 1.75  | −1.31  | 4.84  | 6.15  | 1.57 |
| cc17                   | 5000 | 0.28  | −4.23  | 4.45  | 8.68  | 2.21 |
| Charco da Candieira    | 5000 | −4.49 | −9.13  | −0.01 | 9.12  | 2.33 |
| Gador                  | 5000 | 3.06  | 0.80   | 5.41  | 4.61  | 1.18 |
| Golfo                  | 5000 | 2.00  | −0.32  | 4.15  | 4.47  | 1.14 |
| Guadiana               | 5000 | 2.30  | 0.05   | 4.76  | 4.71  | 1.20 |
| Lago de Ajo            | 5000 | −4.81 | −10.30 | −0.89 | 9.41  | 2.40 |
| Laguna de la Roya      | 5000 | −7.03 | −13.42 | −1.24 | 12.18 | 3.11 |
| Lake Racou             | 5000 | −2.71 | −6.97  | 1.60  | 8.57  | 2.19 |
| Las Pardillas Lake     | 5000 | −1.21 | −6.28  | 2.25  | 8.53  | 2.18 |
| Navarres 1             | 5000 | −0.57 | −5.73  | 3.36  | 9.09  | 2.32 |

Table 1: *(continued)*

| site                   | age  | value | lower  | upper | range | se   |
|------------------------|------|-------|--------|-------|-------|------|
| Puerto de Belate       | 5000 | -0.82 | -4.19  | 2.52  | 6.71  | 1.71 |
| Puerto de Los Tornos   | 5000 | -4.24 | -7.96  | -0.19 | 7.77  | 1.98 |
| Quintanar de la Sierra | 5000 | -2.00 | -6.62  | 2.43  | 9.05  | 2.31 |
| Roquetas de Mar        | 5000 | 2.07  | -1.85  | 4.60  | 6.45  | 1.65 |
| Saldropo               | 5000 | -0.40 | -3.82  | 3.25  | 7.07  | 1.80 |
| Sanabria Marsh         | 5000 | -2.37 | -8.08  | 2.13  | 10.21 | 2.60 |
| San Rafael             | 5000 | 0.26  | -3.54  | 3.32  | 6.86  | 1.75 |
| Santo Andre            | 5000 | -0.59 | -4.33  | 2.86  | 7.19  | 1.83 |
| Siles                  | 5000 | 1.98  | -1.41  | 4.78  | 6.19  | 1.58 |
| Padul                  | 5000 | 1.39  | -1.56  | 4.60  | 6.16  | 1.57 |
| Lourdes                | 5000 | -6.12 | -10.84 | -1.47 | 9.37  | 2.39 |
| Monge                  | 5000 | -6.81 | -10.97 | -2.68 | 8.29  | 2.11 |
| Moura                  | 5000 | -7.55 | -12.90 | -2.28 | 10.62 | 2.71 |
| Banyoles               | 5000 | -2.05 | -6.41  | 2.34  | 8.75  | 2.23 |
| Albufera Alcudia       | 6000 | -0.90 | -3.62  | 2.44  | 6.06  | 1.55 |
| Algendar               | 6000 | -1.78 | -6.10  | 1.59  | 7.69  | 1.96 |
| Antas                  | 6000 | 1.98  | -2.26  | 6.37  | 8.63  | 2.20 |
| Barbaroxa              | 6000 | 0.03  | -3.47  | 3.46  | 6.93  | 1.77 |
| Cala Galdana           | 6000 | 1.46  | -1.27  | 4.86  | 6.13  | 1.56 |
| Cala n" Porter         | 6000 | -0.88 | -3.85  | 1.89  | 5.74  | 1.46 |
| cc17                   | 6000 | 0.18  | -3.90  | 4.71  | 8.61  | 2.20 |
| Charco da Candieira    | 6000 | -3.16 | -6.83  | 0.41  | 7.24  | 1.85 |
| Gador                  | 6000 | 2.04  | 0.13   | 4.25  | 4.12  | 1.05 |
| Golfo                  | 6000 | 2.46  | 0.09   | 4.75  | 4.66  | 1.19 |
| Guadiana               | 6000 | 2.33  | -0.35  | 4.60  | 4.95  | 1.26 |
| Hoya del Castilho      | 6000 | -0.68 | -5.86  | 4.13  | 9.99  | 2.55 |
| Lago de Ajo            | 6000 | -6.12 | -11.52 | -1.26 | 10.26 | 2.62 |
| Laguna de la Roya      | 6000 | -7.05 | -13.24 | -1.45 | 11.79 | 3.01 |
| Lake Racou             | 6000 | -5.59 | -10.76 | -0.98 | 9.78  | 2.49 |
| Las Pardillas Lake     | 6000 | -1.65 | -6.38  | 2.17  | 8.55  | 2.18 |
| Navarres 1             | 6000 | -1.60 | -7.06  | 2.64  | 9.70  | 2.47 |
| Puerto de Belate       | 6000 | -1.77 | -4.99  | 1.57  | 6.56  | 1.67 |
| Puerto de Los Tornos   | 6000 | -3.05 | -6.09  | 1.28  | 7.37  | 1.88 |
| Quintanar de la Sierra | 6000 | -1.08 | -6.22  | 2.76  | 8.98  | 2.29 |
| Roquetas de Mar        | 6000 | 0.76  | -2.61  | 4.63  | 7.24  | 1.85 |
| Saldropo               | 6000 | -2.38 | -5.35  | 1.85  | 7.20  | 1.84 |
| Sanabria Marsh         | 6000 | -3.55 | -9.55  | 1.06  | 10.61 | 2.71 |
| San Rafael             | 6000 | 1.79  | -1.58  | 4.58  | 6.16  | 1.57 |
| Santo Andre            | 6000 | -0.97 | -5.17  | 3.37  | 8.54  | 2.18 |
| Siles                  | 6000 | 3.02  | -0.24  | 5.26  | 5.50  | 1.40 |

Table 1: (*continued*)

| site                   | age  | value | lower  | upper | range | se   |
|------------------------|------|-------|--------|-------|-------|------|
| Padul                  | 6000 | 3.25  | -0.01  | 6.17  | 6.18  | 1.58 |
| Lourdes                | 6000 | -6.68 | -13.06 | -0.14 | 12.92 | 3.30 |
| Monge                  | 6000 | -6.94 | -12.01 | -2.02 | 9.99  | 2.55 |
| Moura                  | 6000 | -3.30 | -8.96  | 1.75  | 10.71 | 2.73 |
| Banyoles               | 6000 | -1.25 | -5.82  | 3.03  | 8.85  | 2.26 |
| Albufera Alcudia       | 7000 | -0.77 | -3.79  | 2.23  | 6.02  | 1.54 |
| Algendar               | 7000 | -3.46 | -7.96  | 0.37  | 8.33  | 2.12 |
| Antas                  | 7000 | 2.57  | -0.35  | 5.57  | 5.92  | 1.51 |
| Barbaroxa              | 7000 | 1.22  | -1.84  | 4.20  | 6.04  | 1.54 |
| Cala Galdana           | 7000 | -0.61 | -5.21  | 3.12  | 8.33  | 2.12 |
| Cala n" Porter         | 7000 | -1.90 | -5.69  | 1.56  | 7.25  | 1.85 |
| cc17                   | 7000 | 0.17  | -4.01  | 3.80  | 7.81  | 1.99 |
| Charco da Candieira    | 7000 | -3.43 | -7.36  | 0.39  | 7.75  | 1.98 |
| Golfo                  | 7000 | 2.49  | 0.09   | 4.89  | 4.80  | 1.22 |
| Guadiana               | 7000 | 1.44  | -1.35  | 3.91  | 5.26  | 1.34 |
| Hoya del Castilho      | 7000 | -0.05 | -5.30  | 4.75  | 10.05 | 2.56 |
| Lago de Ajo            | 7000 | -6.36 | -11.66 | -1.16 | 10.50 | 2.68 |
| Laguna de la Roya      | 7000 | -6.83 | -12.91 | -1.10 | 11.81 | 3.01 |
| Lake Racou             | 7000 | -4.38 | -8.72  | 0.39  | 9.11  | 2.32 |
| Las Pardillas Lake     | 7000 | -1.50 | -6.22  | 2.00  | 8.22  | 2.10 |
| Navarres 1             | 7000 | -2.68 | -8.43  | 1.89  | 10.32 | 2.63 |
| Puerto de Belate       | 7000 | -3.19 | -7.00  | 0.80  | 7.80  | 1.99 |
| Puerto de Los Tornos   | 7000 | -1.86 | -5.89  | 2.41  | 8.30  | 2.12 |
| Quintanar de la Sierra | 7000 | -1.45 | -6.29  | 2.71  | 9.00  | 2.30 |
| Saldropo               | 7000 | -3.16 | -8.74  | 2.12  | 10.86 | 2.77 |
| Sanabria Marsh         | 7000 | -2.75 | -7.65  | 1.76  | 9.41  | 2.40 |
| San Rafael             | 7000 | 1.38  | -1.86  | 4.11  | 5.97  | 1.52 |
| Santo Andre            | 7000 | -1.71 | -6.02  | 3.56  | 9.58  | 2.44 |
| Siles                  | 7000 | 0.60  | -2.69  | 3.91  | 6.60  | 1.68 |
| Padul                  | 7000 | 3.20  | -0.24  | 5.75  | 5.99  | 1.53 |
| Lourdes                | 7000 | -7.23 | -13.52 | -1.11 | 12.41 | 3.17 |
| Monge                  | 7000 | -5.66 | -11.24 | 0.06  | 11.30 | 2.88 |
| Moura                  | 7000 | -3.95 | -8.87  | 0.48  | 9.35  | 2.39 |
| Banyoles               | 7000 | -2.44 | -6.36  | 1.57  | 7.93  | 2.02 |
| Albufera Alcudia       | 8000 | -0.72 | -3.96  | 2.02  | 5.98  | 1.53 |
| Algendar               | 8000 | -2.61 | -7.02  | 0.98  | 8.00  | 2.04 |
| Antas                  | 8000 | 2.35  | -0.02  | 4.95  | 4.97  | 1.27 |
| Cala Galdana           | 8000 | -2.61 | -6.48  | 1.08  | 7.56  | 1.93 |
| Cala n" Porter         | 8000 | -2.18 | -5.77  | 1.08  | 6.85  | 1.75 |
| cc17                   | 8000 | 0.61  | -3.58  | 4.32  | 7.90  | 2.02 |

Table 1: *(continued)*

| site                   | age  | value | lower  | upper | range | se   |
|------------------------|------|-------|--------|-------|-------|------|
| Charco da Candieira    | 8000 | -2.67 | -7.28  | 1.36  | 8.64  | 2.20 |
| Golfo                  | 8000 | 1.92  | -0.67  | 4.41  | 5.08  | 1.30 |
| Guadiana               | 8000 | 1.43  | -1.70  | 4.13  | 5.83  | 1.49 |
| Hoya del Castilho      | 8000 | 0.39  | -3.66  | 4.43  | 8.09  | 2.06 |
| Lago de Ajo            | 8000 | -6.06 | -11.69 | -0.92 | 10.77 | 2.75 |
| Laguna de la Roya      | 8000 | -7.13 | -13.89 | -1.10 | 12.79 | 3.26 |
| Lake Racou             | 8000 | -3.91 | -7.32  | 0.89  | 8.21  | 2.09 |
| Las Pardillas Lake     | 8000 | -1.34 | -6.24  | 2.30  | 8.54  | 2.18 |
| Navarres 1             | 8000 | -3.74 | -9.76  | 1.14  | 10.90 | 2.78 |
| Puerto de Belate       | 8000 | -5.21 | -9.60  | -0.84 | 8.76  | 2.23 |
| Puerto de Los Tornos   | 8000 | -6.31 | -11.74 | -1.19 | 10.55 | 2.69 |
| Quintanar de la Sierra | 8000 | -1.68 | -6.48  | 2.64  | 9.12  | 2.33 |
| Saldropo               | 8000 | -3.84 | -10.02 | 1.13  | 11.15 | 2.84 |
| Sanabria Marsh         | 8000 | -4.48 | -10.20 | 0.11  | 10.31 | 2.63 |
| San Rafael             | 8000 | 1.47  | -1.80  | 4.18  | 5.98  | 1.53 |
| Santo Andre            | 8000 | -0.12 | -3.51  | 4.59  | 8.10  | 2.07 |
| Siles                  | 8000 | -0.09 | -4.04  | 3.60  | 7.64  | 1.95 |
| Padul                  | 8000 | 2.84  | -1.23  | 5.56  | 6.79  | 1.73 |
| Lourdes                | 8000 | -6.06 | -11.92 | -0.73 | 11.19 | 2.85 |
| Monge                  | 8000 | -7.06 | -13.39 | -1.06 | 12.33 | 3.15 |
| Moura                  | 8000 | -5.74 | -11.18 | -0.85 | 10.33 | 2.64 |
| Banyoles               | 8000 | -3.58 | -6.91  | 0.31  | 7.22  | 1.84 |
| Albufera Alcudia       | 9000 | -0.49 | -3.58  | 2.43  | 6.01  | 1.53 |
| Algendar               | 9000 | -3.98 | -9.07  | -0.17 | 8.90  | 2.27 |
| Antas                  | 9000 | 2.52  | 0.15   | 5.01  | 4.86  | 1.24 |
| Cala n" Porter         | 9000 | -2.63 | -6.60  | 1.27  | 7.87  | 2.01 |
| cc17                   | 9000 | 0.73  | -3.24  | 4.24  | 7.48  | 1.91 |
| Charco da Candieira    | 9000 | -3.31 | -8.03  | 1.28  | 9.31  | 2.37 |
| Golfo                  | 9000 | 1.21  | -1.70  | 3.83  | 5.53  | 1.41 |
| Guadiana               | 9000 | 2.12  | -0.71  | 4.67  | 5.38  | 1.37 |
| Hoya del Castilho      | 9000 | 1.11  | -2.81  | 4.53  | 7.34  | 1.87 |
| Lago de Ajo            | 9000 | -5.77 | -11.39 | -1.03 | 10.36 | 2.64 |
| Laguna de la Roya      | 9000 | -7.36 | -14.25 | -0.93 | 13.32 | 3.40 |
| Lake Racou             | 9000 | -5.08 | -9.13  | 0.22  | 9.35  | 2.39 |
| Las Pardillas Lake     | 9000 | -1.91 | -6.13  | 2.78  | 8.91  | 2.27 |
| Navarres 1             | 9000 | -4.74 | -10.99 | 0.42  | 11.41 | 2.91 |
| Puerto de Los Tornos   | 9000 | -5.03 | -10.38 | -0.41 | 9.97  | 2.54 |
| Quintanar de la Sierra | 9000 | -0.97 | -5.51  | 3.01  | 8.52  | 2.17 |
| Sanabria Marsh         | 9000 | -6.59 | -12.45 | -1.00 | 11.45 | 2.92 |
| San Rafael             | 9000 | 0.35  | -3.25  | 3.47  | 6.72  | 1.71 |

Table 1: (*continued*)

| site                   | age   | value | lower  | upper | range | se   |
|------------------------|-------|-------|--------|-------|-------|------|
| Santo Andre            | 9000  | 1.85  | -1.34  | 5.55  | 6.89  | 1.76 |
| Siles                  | 9000  | 0.44  | -3.04  | 3.70  | 6.74  | 1.72 |
| Padul                  | 9000  | 3.42  | -0.12  | 6.27  | 6.39  | 1.63 |
| Lourdes                | 9000  | -3.44 | -8.91  | 0.68  | 9.59  | 2.45 |
| Monge                  | 9000  | -6.90 | -12.77 | -0.88 | 11.89 | 3.03 |
| Moura                  | 9000  | -6.50 | -13.35 | -0.17 | 13.18 | 3.36 |
| Banyoles               | 9000  | -3.76 | -7.22  | 0.37  | 7.59  | 1.94 |
| Albufera Alcudia       | 10000 | -1.28 | -4.58  | 1.94  | 6.52  | 1.66 |
| cc17                   | 10000 | -3.15 | -8.16  | 1.74  | 9.90  | 2.53 |
| Charco da Candieira    | 10000 | -5.74 | -11.90 | -1.03 | 10.87 | 2.77 |
| Golfo                  | 10000 | 0.94  | -2.28  | 3.67  | 5.95  | 1.52 |
| Guadiana               | 10000 | -0.34 | -5.00  | 3.48  | 8.48  | 2.16 |
| Hoya del Castilho      | 10000 | -1.70 | -7.18  | 2.60  | 9.78  | 2.49 |
| Lago de Ajo            | 10000 | -5.78 | -12.50 | -1.09 | 11.41 | 2.91 |
| Laguna de la Roya      | 10000 | -7.57 | -14.96 | -0.97 | 13.99 | 3.57 |
| Lake Racou             | 10000 | -5.29 | -11.13 | -0.35 | 10.78 | 2.75 |
| Las Pardillas Lake     | 10000 | -1.83 | -6.27  | 2.42  | 8.69  | 2.22 |
| Navarres 1             | 10000 | -5.61 | -12.06 | -0.25 | 11.81 | 3.01 |
| Quintanar de la Sierra | 10000 | -3.01 | -7.51  | 1.78  | 9.29  | 2.37 |
| Sanabria Marsh         | 10000 | -2.77 | -7.08  | 1.74  | 8.82  | 2.25 |
| San Rafael             | 10000 | -0.56 | -4.82  | 3.10  | 7.92  | 2.02 |
| Santo Andre            | 10000 | 2.21  | -1.62  | 5.65  | 7.27  | 1.85 |
| Siles                  | 10000 | 1.28  | -2.64  | 4.41  | 7.05  | 1.80 |
| Padul                  | 10000 | 2.35  | -1.37  | 5.81  | 7.18  | 1.83 |
| Lourdes                | 10000 | -5.30 | -10.94 | 0.15  | 11.09 | 2.83 |
| Monge                  | 10000 | -7.54 | -13.93 | -0.99 | 12.94 | 3.30 |
| Moura                  | 10000 | -6.09 | -11.72 | -1.24 | 10.48 | 2.67 |
| Banyoles               | 10000 | -5.51 | -9.52  | -0.83 | 8.69  | 2.22 |
| Albufera Alcudia       | 11000 | -8.12 | -14.89 | -1.64 | 13.25 | 3.38 |
| cc17                   | 11000 | -2.60 | -8.03  | 2.41  | 10.44 | 2.66 |
| Charco da Candieira    | 11000 | -7.89 | -13.34 | -2.67 | 10.67 | 2.72 |
| Golfo                  | 11000 | -0.03 | -3.24  | 2.71  | 5.95  | 1.52 |
| Guadiana               | 11000 | -3.77 | -8.71  | 1.17  | 9.88  | 2.52 |
| Lago de Ajo            | 11000 | -6.36 | -13.75 | -0.85 | 12.90 | 3.29 |
| Laguna de la Roya      | 11000 | -6.68 | -13.29 | -0.79 | 12.50 | 3.19 |
| Lake Racou             | 11000 | -8.46 | -14.34 | -2.69 | 11.65 | 2.97 |
| Las Pardillas Lake     | 11000 | -8.92 | -13.96 | -4.18 | 9.78  | 2.49 |
| Navarres 1             | 11000 | -6.37 | -12.96 | -0.83 | 12.13 | 3.09 |
| Quintanar de la Sierra | 11000 | -7.22 | -12.34 | -1.59 | 10.75 | 2.74 |
| Sanabria Marsh         | 11000 | -3.88 | -9.33  | 1.26  | 10.59 | 2.70 |

Table 1: *(continued)*

| site                   | age   | value | lower  | upper | range | se   |
|------------------------|-------|-------|--------|-------|-------|------|
| San Rafael             | 11000 | -0.86 | -5.47  | 3.14  | 8.61  | 2.20 |
| Santo Andre            | 11000 | 0.14  | -4.78  | 4.37  | 9.15  | 2.33 |
| Siles                  | 11000 | 2.26  | -0.40  | 4.92  | 5.32  | 1.36 |
| Padul                  | 11000 | 1.59  | -2.54  | 5.11  | 7.65  | 1.95 |
| Lourdes                | 11000 | -5.74 | -11.84 | -0.07 | 11.77 | 3.00 |
| Monge                  | 11000 | -9.91 | -16.17 | -3.86 | 12.31 | 3.14 |
| Moura                  | 11000 | -8.40 | -14.38 | -2.95 | 11.43 | 2.92 |
| Banyoles               | 11000 | -5.85 | -10.70 | -1.34 | 9.36  | 2.39 |
| cc17                   | 12000 | -8.18 | -14.84 | -1.55 | 13.29 | 3.39 |
| Charco da Candieira    | 12000 | -5.80 | -10.66 | -1.12 | 9.54  | 2.43 |
| Golfo                  | 12000 | -4.75 | -8.80  | -1.06 | 7.74  | 1.97 |
| Guadiana               | 12000 | -4.46 | -9.18  | 0.25  | 9.43  | 2.41 |
| Lago de Ajo            | 12000 | -6.68 | -14.00 | -0.94 | 13.06 | 3.33 |
| Laguna de la Roya      | 12000 | -7.26 | -12.36 | -2.06 | 10.30 | 2.63 |
| Lake Racou             | 12000 | -8.16 | -13.37 | -2.91 | 10.46 | 2.67 |
| Navarres 1             | 12000 | -7.02 | -13.70 | -1.35 | 12.35 | 3.15 |
| Quintanar de la Sierra | 12000 | -8.31 | -13.46 | -3.42 | 10.04 | 2.56 |
| Sanabria Marsh         | 12000 | -7.58 | -13.61 | -1.74 | 11.87 | 3.03 |
| San Rafael             | 12000 | 0.58  | -2.46  | 3.36  | 5.82  | 1.48 |
| Santo Andre            | 12000 | -3.61 | -9.50  | 2.02  | 11.52 | 2.94 |
| Siles                  | 12000 | 1.53  | -0.48  | 4.91  | 5.39  | 1.38 |
| Padul                  | 12000 | -0.85 | -5.06  | 2.69  | 7.75  | 1.98 |
| Lourdes                | 12000 | -8.55 | -15.21 | -2.20 | 13.01 | 3.32 |
| Monge                  | 12000 | -9.77 | -16.58 | -3.76 | 12.82 | 3.27 |
| Moura                  | 12000 | -4.74 | -10.66 | 1.54  | 12.20 | 3.11 |
| Banyoles               | 12000 | -7.61 | -13.55 | -1.85 | 11.70 | 2.98 |
| Charco da Candieira    | 13000 | -4.99 | -9.72  | -0.32 | 9.40  | 2.40 |
| Golfo                  | 13000 | -7.73 | -12.25 | -3.28 | 8.97  | 2.29 |
| Guadiana               | 13000 | -1.08 | -4.54  | 2.67  | 7.21  | 1.84 |
| Lago de Ajo            | 13000 | -6.62 | -13.85 | -1.57 | 12.28 | 3.13 |
| Laguna de la Roya      | 13000 | -7.57 | -12.94 | -1.96 | 10.98 | 2.80 |
| Navarres 1             | 13000 | -7.58 | -14.31 | -1.81 | 12.50 | 3.19 |
| Quintanar de la Sierra | 13000 | -6.67 | -11.68 | -1.85 | 9.83  | 2.51 |
| Sanabria Marsh         | 13000 | -7.71 | -14.42 | -1.57 | 12.85 | 3.28 |
| San Rafael             | 13000 | 0.14  | -3.63  | 3.70  | 7.33  | 1.87 |
| Santo Andre            | 13000 | -5.96 | -12.51 | 0.83  | 13.34 | 3.40 |
| Siles                  | 13000 | 0.27  | -3.05  | 3.68  | 6.73  | 1.72 |
| Padul                  | 13000 | -1.69 | -6.28  | 2.01  | 8.29  | 2.11 |
| Lourdes                | 13000 | -9.27 | -14.89 | -3.52 | 11.37 | 2.90 |
| Monge                  | 13000 | -8.96 | -14.96 | -3.40 | 11.56 | 2.95 |

Table 1: *(continued)*

| site                   | age   | value | lower  | upper | range | se   |
|------------------------|-------|-------|--------|-------|-------|------|
| Banyoles               | 13000 | -8.17 | -14.50 | -2.13 | 12.37 | 3.16 |
| Charco da Candieira    | 14000 | -8.97 | -15.52 | -2.74 | 12.78 | 3.26 |
| Golfo                  | 14000 | -8.13 | -13.11 | -2.83 | 10.28 | 2.62 |
| Lago de Ajo            | 14000 | -7.64 | -13.74 | -2.19 | 11.55 | 2.95 |
| Laguna de la Roya      | 14000 | -6.27 | -11.45 | -0.51 | 10.94 | 2.79 |
| Navarres 1             | 14000 | -8.06 | -14.81 | -2.21 | 12.60 | 3.21 |
| Quintanar de la Sierra | 14000 | -8.06 | -13.79 | -2.56 | 11.23 | 2.86 |
| Sanabria Marsh         | 14000 | -7.35 | -13.35 | -3.29 | 10.06 | 2.57 |
| San Rafael             | 14000 | 0.89  | -3.19  | 5.36  | 8.55  | 2.18 |
| Santo Andre            | 14000 | -4.20 | -10.77 | 2.16  | 12.93 | 3.30 |
| Siles                  | 14000 | -0.32 | -4.03  | 3.39  | 7.42  | 1.89 |
| Padul                  | 14000 | 0.89  | -3.24  | 4.47  | 7.71  | 1.97 |
| Lourdes                | 14000 | -6.86 | -11.99 | -1.04 | 10.95 | 2.79 |
| Monge                  | 14000 | -5.62 | -12.32 | -0.57 | 11.75 | 3.00 |
| Banyoles               | 14000 | -6.73 | -12.29 | -1.25 | 11.04 | 2.82 |
| Lago de Ajo            | 15000 | -8.46 | -14.12 | -2.51 | 11.61 | 2.96 |
| Laguna de la Roya      | 15000 | -7.00 | -11.73 | -1.06 | 10.67 | 2.72 |
| Navarres 1             | 15000 | -8.47 | -15.23 | -2.58 | 12.65 | 3.23 |
| Quintanar de la Sierra | 15000 | -8.45 | -13.69 | -3.62 | 10.07 | 2.57 |
| San Rafael             | 15000 | 1.75  | -2.38  | 6.28  | 8.66  | 2.21 |
| Santo Andre            | 15000 | -7.11 | -14.20 | -0.52 | 13.68 | 3.49 |
| Siles                  | 15000 | 0.38  | -3.25  | 3.27  | 6.52  | 1.66 |
| Padul                  | 15000 | -4.16 | -8.90  | 1.44  | 10.34 | 2.64 |
| Lourdes                | 15000 | -6.66 | -12.40 | -0.86 | 11.54 | 2.94 |
| Banyoles               | 15000 | -5.95 | -11.67 | -0.33 | 11.34 | 2.89 |

Table 2: Maximum July temperature

| site                   | age  | value | lower | upper | range | se   |
|------------------------|------|-------|-------|-------|-------|------|
| Albufera Alcudia       | 1000 | 26.09 | 22.10 | 29.97 | 7.87  | 2.01 |
| Algendar               | 1000 | 26.30 | 22.28 | 31.34 | 9.06  | 2.31 |
| Antas                  | 1000 | 28.35 | 25.30 | 31.08 | 5.78  | 1.47 |
| Barbaroxa              | 1000 | 23.63 | 20.11 | 27.03 | 6.92  | 1.77 |
| Cala Galdana           | 1000 | 26.49 | 21.48 | 30.63 | 9.15  | 2.33 |
| cc17                   | 1000 | 24.31 | 20.03 | 27.82 | 7.79  | 1.99 |
| Charco da Candieira    | 1000 | 22.63 | 18.94 | 26.19 | 7.25  | 1.85 |
| Gador                  | 1000 | 25.23 | 22.03 | 27.49 | 5.46  | 1.39 |
| Golfo                  | 1000 | 24.90 | 22.03 | 27.61 | 5.58  | 1.42 |
| Lago de Ajo            | 1000 | 19.80 | 15.30 | 24.64 | 9.34  | 2.38 |
| Laguna de la Roya      | 1000 | 20.13 | 15.15 | 25.23 | 10.08 | 2.57 |
| Lake Racou             | 1000 | 22.17 | 17.45 | 26.16 | 8.71  | 2.22 |
| Las Pardillas Lake     | 1000 | 22.55 | 18.90 | 26.79 | 7.89  | 2.01 |
| Puerto de Belate       | 1000 | 21.07 | 17.85 | 25.19 | 7.34  | 1.87 |
| Puerto de Los Tornos   | 1000 | 22.20 | 18.34 | 25.83 | 7.49  | 1.91 |
| Quintanar de la Sierra | 1000 | 24.57 | 19.97 | 28.73 | 8.76  | 2.23 |
| Saldropo               | 1000 | 21.51 | 17.53 | 25.98 | 8.45  | 2.16 |
| Sanabria Marsh         | 1000 | 20.61 | 16.23 | 24.95 | 8.72  | 2.22 |
| San Rafael             | 1000 | 24.74 | 20.66 | 28.75 | 8.09  | 2.06 |
| Santo Andre            | 1000 | 22.87 | 18.71 | 27.25 | 8.54  | 2.18 |
| Siles                  | 1000 | 26.33 | 23.29 | 29.31 | 6.02  | 1.54 |
| Lourdes                | 1000 | 19.87 | 15.03 | 24.48 | 9.45  | 2.41 |
| Monge                  | 1000 | 20.09 | 15.17 | 24.87 | 9.70  | 2.47 |
| Banyoles               | 1000 | 22.66 | 18.29 | 26.72 | 8.43  | 2.15 |
| Albufera Alcudia       | 2000 | 25.02 | 21.14 | 28.93 | 7.79  | 1.99 |
| Algendar               | 2000 | 25.32 | 21.63 | 29.08 | 7.45  | 1.90 |
| Antas                  | 2000 | 28.24 | 25.11 | 31.45 | 6.34  | 1.62 |
| Barbaroxa              | 2000 | 23.59 | 20.22 | 26.79 | 6.57  | 1.68 |
| Cala Galdana           | 2000 | 23.80 | 20.38 | 28.09 | 7.71  | 1.97 |
| cc17                   | 2000 | 24.36 | 20.16 | 27.64 | 7.48  | 1.91 |
| Charco da Candieira    | 2000 | 21.19 | 17.39 | 24.85 | 7.46  | 1.90 |
| Gador                  | 2000 | 27.14 | 24.22 | 29.74 | 5.52  | 1.41 |
| Golfo                  | 2000 | 24.17 | 21.31 | 26.86 | 5.55  | 1.42 |
| Lago de Ajo            | 2000 | 19.81 | 15.26 | 24.07 | 8.81  | 2.25 |
| Laguna de la Roya      | 2000 | 20.01 | 15.15 | 24.46 | 9.31  | 2.38 |
| Lake Racou             | 2000 | 21.44 | 17.13 | 25.45 | 8.32  | 2.12 |
| Las Pardillas Lake     | 2000 | 22.22 | 18.29 | 26.18 | 7.89  | 2.01 |
| Puerto de Belate       | 2000 | 21.22 | 17.23 | 24.75 | 7.52  | 1.92 |
| Puerto de Los Tornos   | 2000 | 22.56 | 18.76 | 25.97 | 7.21  | 1.84 |
| Quintanar de la Sierra | 2000 | 21.68 | 17.56 | 25.54 | 7.98  | 2.04 |

Table 2: *(continued)*

| site                   | age  | value | lower | upper | range | se   |
|------------------------|------|-------|-------|-------|-------|------|
| Roquetas de Mar        | 2000 | 25.00 | 20.34 | 29.45 | 9.11  | 2.32 |
| Saldropo               | 2000 | 21.64 | 18.07 | 25.75 | 7.68  | 1.96 |
| Sanabria Marsh         | 2000 | 21.09 | 16.61 | 25.59 | 8.98  | 2.29 |
| San Rafael             | 2000 | 24.54 | 19.74 | 29.20 | 9.46  | 2.41 |
| Santo Andre            | 2000 | 23.65 | 19.92 | 27.21 | 7.29  | 1.86 |
| Siles                  | 2000 | 26.67 | 23.51 | 29.74 | 6.23  | 1.59 |
| Lourdes                | 2000 | 19.60 | 15.32 | 23.80 | 8.48  | 2.16 |
| Monge                  | 2000 | 19.46 | 14.37 | 24.35 | 9.98  | 2.55 |
| Banyoles               | 2000 | 22.48 | 17.44 | 26.95 | 9.51  | 2.43 |
| Albufera Alcudia       | 3000 | 24.73 | 21.22 | 28.32 | 7.10  | 1.81 |
| Algendar               | 3000 | 25.89 | 21.55 | 29.71 | 8.16  | 2.08 |
| Antas                  | 3000 | 28.60 | 25.10 | 32.14 | 7.04  | 1.80 |
| Barbaroxa              | 3000 | 22.17 | 18.43 | 25.79 | 7.36  | 1.88 |
| Cala Galdana           | 3000 | 24.99 | 21.31 | 28.45 | 7.14  | 1.82 |
| cc17                   | 3000 | 23.98 | 20.06 | 27.56 | 7.50  | 1.91 |
| Charco da Candieira    | 3000 | 21.02 | 17.36 | 24.55 | 7.19  | 1.83 |
| Gador                  | 3000 | 26.26 | 23.15 | 28.87 | 5.72  | 1.46 |
| Golfo                  | 3000 | 24.80 | 21.94 | 27.25 | 5.31  | 1.35 |
| Guadiana               | 3000 | 25.50 | 23.14 | 28.37 | 5.23  | 1.33 |
| Lago de Ajo            | 3000 | 20.03 | 15.22 | 23.97 | 8.75  | 2.23 |
| Laguna de la Roya      | 3000 | 19.77 | 14.97 | 24.45 | 9.48  | 2.42 |
| Lake Racou             | 3000 | 21.37 | 17.57 | 25.48 | 7.91  | 2.02 |
| Las Pardillas Lake     | 3000 | 22.59 | 18.36 | 26.30 | 7.94  | 2.03 |
| Puerto de Belate       | 3000 | 21.25 | 18.24 | 25.59 | 7.35  | 1.88 |
| Puerto de Los Tornos   | 3000 | 22.00 | 18.31 | 25.52 | 7.21  | 1.84 |
| Quintanar de la Sierra | 3000 | 22.58 | 18.30 | 26.06 | 7.76  | 1.98 |
| Roquetas de Mar        | 3000 | 25.52 | 21.39 | 29.54 | 8.15  | 2.08 |
| Saldropo               | 3000 | 21.61 | 17.88 | 25.30 | 7.42  | 1.89 |
| Sanabria Marsh         | 3000 | 20.06 | 14.76 | 25.15 | 10.39 | 2.65 |
| San Rafael             | 3000 | 23.63 | 18.49 | 28.92 | 10.43 | 2.66 |
| Santo Andre            | 3000 | 24.13 | 20.07 | 27.72 | 7.65  | 1.95 |
| Siles                  | 3000 | 26.64 | 23.55 | 29.70 | 6.15  | 1.57 |
| Lourdes                | 3000 | 19.11 | 14.30 | 23.69 | 9.39  | 2.40 |
| Monge                  | 3000 | 18.86 | 14.41 | 23.11 | 8.70  | 2.22 |
| Banyoles               | 3000 | 23.30 | 18.39 | 27.39 | 9.00  | 2.30 |
| Albufera Alcudia       | 4000 | 24.40 | 20.95 | 27.96 | 7.01  | 1.79 |
| Algendar               | 4000 | 25.61 | 22.22 | 29.30 | 7.08  | 1.81 |
| Antas                  | 4000 | 28.60 | 24.48 | 32.75 | 8.27  | 2.11 |
| Barbaroxa              | 4000 | 23.22 | 19.92 | 26.69 | 6.77  | 1.73 |
| Cala Galdana           | 4000 | 26.88 | 22.71 | 29.65 | 6.94  | 1.77 |

Table 2: *(continued)*

| site                   | age  | value | lower | upper | range | se   |
|------------------------|------|-------|-------|-------|-------|------|
| Cala n” Porter         | 4000 | 26.32 | 22.44 | 29.21 | 6.77  | 1.73 |
| cc17                   | 4000 | 24.60 | 20.49 | 28.30 | 7.81  | 1.99 |
| Charco da Candieira    | 4000 | 20.60 | 16.38 | 24.72 | 8.34  | 2.13 |
| Gador                  | 4000 | 26.67 | 23.63 | 29.68 | 6.05  | 1.54 |
| Golfo                  | 4000 | 25.01 | 22.37 | 27.47 | 5.10  | 1.30 |
| Guadiana               | 4000 | 26.07 | 23.22 | 28.64 | 5.42  | 1.38 |
| Lago de Ajo            | 4000 | 19.91 | 15.30 | 23.87 | 8.57  | 2.19 |
| Laguna de la Roya      | 4000 | 20.06 | 15.28 | 24.74 | 9.46  | 2.41 |
| Lake Racou             | 4000 | 22.16 | 18.02 | 25.48 | 7.46  | 1.90 |
| Las Pardillas Lake     | 4000 | 22.14 | 17.43 | 26.76 | 9.33  | 2.38 |
| Navarres 1             | 4000 | 25.74 | 20.73 | 29.52 | 8.79  | 2.24 |
| Puerto de Belate       | 4000 | 20.10 | 16.29 | 24.06 | 7.77  | 1.98 |
| Puerto de Los Tornos   | 4000 | 21.79 | 18.09 | 25.23 | 7.14  | 1.82 |
| Quintanar de la Sierra | 4000 | 23.19 | 18.54 | 27.03 | 8.49  | 2.17 |
| Roquetas de Mar        | 4000 | 25.39 | 21.44 | 29.44 | 8.00  | 2.04 |
| Saldropo               | 4000 | 22.01 | 18.44 | 25.82 | 7.38  | 1.88 |
| Sanabria Marsh         | 4000 | 21.46 | 16.42 | 26.15 | 9.73  | 2.48 |
| San Rafael             | 4000 | 22.54 | 16.72 | 28.30 | 11.58 | 2.95 |
| Santo Andre            | 4000 | 23.31 | 19.33 | 27.11 | 7.78  | 1.98 |
| Siles                  | 4000 | 27.00 | 23.85 | 29.99 | 6.14  | 1.57 |
| Lourdes                | 4000 | 18.94 | 14.63 | 23.10 | 8.47  | 2.16 |
| Monge                  | 4000 | 19.13 | 14.34 | 23.66 | 9.32  | 2.38 |
| Moura                  | 4000 | 20.26 | 16.40 | 24.29 | 7.89  | 2.01 |
| Banyoles               | 4000 | 23.36 | 18.47 | 27.02 | 8.55  | 2.18 |
| Albufera Alcudia       | 5000 | 24.31 | 20.69 | 27.56 | 6.87  | 1.75 |
| Algendar               | 5000 | 24.42 | 20.89 | 28.00 | 7.11  | 1.81 |
| Antas                  | 5000 | 28.51 | 24.26 | 33.16 | 8.90  | 2.27 |
| Barbaroxa              | 5000 | 23.29 | 19.53 | 26.66 | 7.13  | 1.82 |
| Cala Galdana           | 5000 | 24.89 | 21.39 | 28.53 | 7.14  | 1.82 |
| Cala n” Porter         | 5000 | 26.42 | 22.78 | 30.19 | 7.41  | 1.89 |
| cc17                   | 5000 | 24.13 | 19.74 | 28.38 | 8.64  | 2.20 |
| Charco da Candieira    | 5000 | 20.69 | 16.72 | 24.57 | 7.85  | 2.00 |
| Gador                  | 5000 | 27.44 | 24.54 | 30.48 | 5.94  | 1.52 |
| Golfo                  | 5000 | 25.05 | 22.33 | 27.82 | 5.49  | 1.40 |
| Guadiana               | 5000 | 25.57 | 22.55 | 28.41 | 5.86  | 1.49 |
| Lago de Ajo            | 5000 | 20.23 | 15.48 | 24.39 | 8.91  | 2.27 |
| Laguna de la Roya      | 5000 | 19.81 | 14.67 | 24.83 | 10.16 | 2.59 |
| Lake Racou             | 5000 | 21.74 | 18.12 | 25.74 | 7.62  | 1.94 |
| Las Pardillas Lake     | 5000 | 22.77 | 18.72 | 27.35 | 8.63  | 2.20 |
| Navarres 1             | 5000 | 25.23 | 20.10 | 29.34 | 9.24  | 2.36 |

Table 2: *(continued)*

| site                   | age  | value | lower | upper | range | se   |
|------------------------|------|-------|-------|-------|-------|------|
| Puerto de Belate       | 5000 | 23.08 | 19.83 | 26.97 | 7.14  | 1.82 |
| Puerto de Los Tornos   | 5000 | 21.00 | 17.23 | 24.85 | 7.62  | 1.94 |
| Quintanar de la Sierra | 5000 | 23.13 | 18.46 | 26.89 | 8.43  | 2.15 |
| Roquetas de Mar        | 5000 | 26.15 | 22.06 | 29.32 | 7.26  | 1.85 |
| Saldropo               | 5000 | 22.90 | 19.72 | 26.81 | 7.09  | 1.81 |
| Sanabria Marsh         | 5000 | 22.43 | 17.34 | 26.79 | 9.45  | 2.41 |
| San Rafael             | 5000 | 24.96 | 21.07 | 28.47 | 7.40  | 1.89 |
| Santo Andre            | 5000 | 24.00 | 20.24 | 27.57 | 7.33  | 1.87 |
| Siles                  | 5000 | 26.17 | 22.82 | 29.61 | 6.79  | 1.73 |
| Padul                  | 5000 | 26.14 | 22.45 | 29.65 | 7.20  | 1.84 |
| Lourdes                | 5000 | 19.09 | 14.70 | 23.80 | 9.10  | 2.32 |
| Monge                  | 5000 | 18.65 | 15.00 | 22.49 | 7.49  | 1.91 |
| Moura                  | 5000 | 19.08 | 14.21 | 23.84 | 9.63  | 2.46 |
| Banyoles               | 5000 | 22.94 | 18.40 | 26.82 | 8.42  | 2.15 |
| Albufera Alcudia       | 6000 | 24.28 | 20.62 | 27.31 | 6.69  | 1.71 |
| Algendar               | 6000 | 22.84 | 18.56 | 27.01 | 8.45  | 2.16 |
| Antas                  | 6000 | 28.42 | 24.50 | 32.94 | 8.44  | 2.15 |
| Barbaroxa              | 6000 | 23.05 | 19.23 | 26.64 | 7.41  | 1.89 |
| Cala Galdana           | 6000 | 25.87 | 21.94 | 29.76 | 7.82  | 1.99 |
| Cala n" Porter         | 6000 | 23.28 | 20.19 | 26.55 | 6.36  | 1.62 |
| cc17                   | 6000 | 24.02 | 19.66 | 28.34 | 8.68  | 2.21 |
| Charco da Candieira    | 6000 | 20.58 | 17.04 | 24.19 | 7.15  | 1.82 |
| Gador                  | 6000 | 26.47 | 23.56 | 28.97 | 5.41  | 1.38 |
| Golfo                  | 6000 | 25.31 | 22.38 | 28.32 | 5.94  | 1.52 |
| Guadiana               | 6000 | 25.48 | 22.44 | 28.28 | 5.84  | 1.49 |
| Hoya del Castillo      | 6000 | 24.34 | 19.36 | 28.91 | 9.55  | 2.44 |
| Lago de Ajo            | 6000 | 19.99 | 15.30 | 24.51 | 9.21  | 2.35 |
| Laguna de la Roya      | 6000 | 19.97 | 14.91 | 24.98 | 10.07 | 2.57 |
| Lake Racou             | 6000 | 20.37 | 15.76 | 24.39 | 8.63  | 2.20 |
| Las Pardillas Lake     | 6000 | 22.43 | 18.61 | 26.88 | 8.27  | 2.11 |
| Navarres 1             | 6000 | 24.68 | 19.44 | 29.13 | 9.69  | 2.47 |
| Puerto de Belate       | 6000 | 22.92 | 19.25 | 26.17 | 6.92  | 1.77 |
| Puerto de Los Tornos   | 6000 | 22.38 | 18.65 | 25.96 | 7.31  | 1.86 |
| Quintanar de la Sierra | 6000 | 23.04 | 18.46 | 27.16 | 8.70  | 2.22 |
| Roquetas de Mar        | 6000 | 25.45 | 21.61 | 29.42 | 7.81  | 1.99 |
| Saldropo               | 6000 | 23.09 | 19.58 | 26.56 | 6.98  | 1.78 |
| Sanabria Marsh         | 6000 | 21.41 | 16.32 | 26.08 | 9.76  | 2.49 |
| San Rafael             | 6000 | 25.88 | 22.16 | 29.23 | 7.07  | 1.80 |
| Santo Andre            | 6000 | 23.36 | 19.31 | 27.84 | 8.53  | 2.18 |
| Siles                  | 6000 | 25.83 | 22.22 | 28.89 | 6.67  | 1.70 |

Table 2: *(continued)*

| site                   | age  | value | lower | upper | range | se   |
|------------------------|------|-------|-------|-------|-------|------|
| Padul                  | 6000 | 26.98 | 23.17 | 30.79 | 7.62  | 1.94 |
| Lourdes                | 6000 | 19.92 | 13.88 | 25.84 | 11.96 | 3.05 |
| Monge                  | 6000 | 19.01 | 14.60 | 23.44 | 8.84  | 2.26 |
| Moura                  | 6000 | 20.89 | 15.52 | 25.82 | 10.30 | 2.63 |
| Banyoles               | 6000 | 23.67 | 19.05 | 27.78 | 8.73  | 2.23 |
| Albufera Alcudia       | 7000 | 23.66 | 20.20 | 26.72 | 6.52  | 1.66 |
| Algendar               | 7000 | 22.09 | 17.49 | 26.49 | 9.00  | 2.30 |
| Antas                  | 7000 | 28.35 | 25.14 | 31.58 | 6.44  | 1.64 |
| Barbaroxa              | 7000 | 24.29 | 20.68 | 27.78 | 7.10  | 1.81 |
| Cala Galdana           | 7000 | 24.64 | 19.89 | 28.86 | 8.97  | 2.29 |
| Cala n" Porter         | 7000 | 23.38 | 19.14 | 26.94 | 7.80  | 1.99 |
| cc17                   | 7000 | 24.18 | 19.93 | 27.95 | 8.02  | 2.05 |
| Charco da Candieira    | 7000 | 20.56 | 16.73 | 24.07 | 7.34  | 1.87 |
| Golfo                  | 7000 | 25.47 | 22.53 | 28.36 | 5.83  | 1.49 |
| Guadiana               | 7000 | 24.49 | 21.39 | 27.54 | 6.15  | 1.57 |
| Hoya del Castillo      | 7000 | 24.33 | 19.54 | 29.12 | 9.58  | 2.44 |
| Lago de Ajo            | 7000 | 19.76 | 14.98 | 24.55 | 9.57  | 2.44 |
| Laguna de la Roya      | 7000 | 19.77 | 14.65 | 24.71 | 10.06 | 2.57 |
| Lake Racou             | 7000 | 21.10 | 16.80 | 24.95 | 8.15  | 2.08 |
| Las Pardillas Lake     | 7000 | 22.67 | 18.58 | 26.65 | 8.07  | 2.06 |
| Navarres 1             | 7000 | 24.11 | 18.78 | 28.87 | 10.09 | 2.57 |
| Puerto de Belate       | 7000 | 23.04 | 18.99 | 26.72 | 7.73  | 1.97 |
| Puerto de Los Tornos   | 7000 | 22.61 | 19.12 | 27.36 | 8.24  | 2.10 |
| Quintanar de la Sierra | 7000 | 22.83 | 18.57 | 27.33 | 8.76  | 2.23 |
| Saldropo               | 7000 | 22.67 | 17.50 | 27.61 | 10.11 | 2.58 |
| Sanabria Marsh         | 7000 | 22.45 | 17.83 | 26.89 | 9.06  | 2.31 |
| San Rafael             | 7000 | 25.78 | 22.06 | 28.88 | 6.82  | 1.74 |
| Santo Andre            | 7000 | 22.21 | 18.18 | 27.66 | 9.48  | 2.42 |
| Siles                  | 7000 | 24.64 | 20.67 | 28.03 | 7.36  | 1.88 |
| Padul                  | 7000 | 27.00 | 23.15 | 30.63 | 7.48  | 1.91 |
| Lourdes                | 7000 | 19.47 | 13.92 | 24.86 | 10.94 | 2.79 |
| Monge                  | 7000 | 20.51 | 15.28 | 25.60 | 10.32 | 2.63 |
| Moura                  | 7000 | 20.11 | 15.72 | 24.41 | 8.69  | 2.22 |
| Banyoles               | 7000 | 23.04 | 18.89 | 26.82 | 7.93  | 2.02 |
| Albufera Alcudia       | 8000 | 23.55 | 20.18 | 26.84 | 6.66  | 1.70 |
| Algendar               | 8000 | 22.71 | 18.32 | 26.90 | 8.58  | 2.19 |
| Antas                  | 8000 | 27.78 | 24.89 | 30.62 | 5.73  | 1.46 |
| Cala Galdana           | 8000 | 22.01 | 18.30 | 25.94 | 7.64  | 1.95 |
| Cala n" Porter         | 8000 | 22.90 | 19.06 | 26.43 | 7.37  | 1.88 |
| cc17                   | 8000 | 24.11 | 19.98 | 28.16 | 8.18  | 2.09 |

Table 2: *(continued)*

| site                   | age  | value | lower | upper | range | se   |
|------------------------|------|-------|-------|-------|-------|------|
| Charco da Candieira    | 8000 | 20.63 | 16.24 | 24.82 | 8.58  | 2.19 |
| Golfo                  | 8000 | 25.32 | 22.31 | 28.23 | 5.92  | 1.51 |
| Guadiana               | 8000 | 25.07 | 21.91 | 28.22 | 6.31  | 1.61 |
| Hoya del Castillo      | 8000 | 25.00 | 20.99 | 28.87 | 7.88  | 2.01 |
| Lago de Ajo            | 8000 | 19.59 | 14.80 | 24.52 | 9.72  | 2.48 |
| Laguna de la Roya      | 8000 | 19.76 | 14.49 | 24.82 | 10.33 | 2.64 |
| Lake Racou             | 8000 | 21.94 | 18.07 | 25.40 | 7.33  | 1.87 |
| Las Pardillas Lake     | 8000 | 22.84 | 18.56 | 27.09 | 8.53  | 2.18 |
| Navarres 1             | 8000 | 23.54 | 18.13 | 28.58 | 10.45 | 2.67 |
| Puerto de Belate       | 8000 | 21.36 | 17.25 | 25.26 | 8.01  | 2.04 |
| Puerto de Los Tornos   | 8000 | 20.60 | 16.20 | 25.37 | 9.17  | 2.34 |
| Quintanar de la Sierra | 8000 | 22.98 | 18.57 | 27.14 | 8.57  | 2.19 |
| Saldropo               | 8000 | 22.26 | 17.56 | 27.41 | 9.85  | 2.51 |
| Sanabria Marsh         | 8000 | 20.72 | 16.18 | 25.29 | 9.11  | 2.32 |
| San Rafael             | 8000 | 25.90 | 22.36 | 29.38 | 7.02  | 1.79 |
| Santo Andre            | 8000 | 23.81 | 19.74 | 28.63 | 8.89  | 2.27 |
| Siles                  | 8000 | 24.22 | 20.38 | 28.32 | 7.94  | 2.03 |
| Padul                  | 8000 | 26.56 | 22.36 | 30.44 | 8.08  | 2.06 |
| Lourdes                | 8000 | 19.88 | 14.76 | 24.79 | 10.03 | 2.56 |
| Monge                  | 8000 | 19.64 | 13.96 | 25.02 | 11.06 | 2.82 |
| Moura                  | 8000 | 20.06 | 15.06 | 24.71 | 9.65  | 2.46 |
| Banyoles               | 8000 | 22.36 | 18.84 | 25.97 | 7.13  | 1.82 |
| Albufera Alcudia       | 9000 | 23.55 | 20.25 | 26.77 | 6.52  | 1.66 |
| Algendar               | 9000 | 21.31 | 16.57 | 25.64 | 9.07  | 2.31 |
| Antas                  | 9000 | 27.84 | 25.07 | 30.61 | 5.54  | 1.41 |
| Cala n" Porter         | 9000 | 22.92 | 18.53 | 26.94 | 8.41  | 2.15 |
| cc17                   | 9000 | 24.60 | 20.43 | 28.05 | 7.62  | 1.94 |
| Charco da Candieira    | 9000 | 20.31 | 15.68 | 24.68 | 9.00  | 2.30 |
| Golfo                  | 9000 | 24.91 | 21.69 | 27.95 | 6.26  | 1.60 |
| Guadiana               | 9000 | 26.32 | 22.83 | 29.20 | 6.37  | 1.63 |
| Hoya del Castillo      | 9000 | 25.72 | 21.90 | 29.17 | 7.27  | 1.85 |
| Lago de Ajo            | 9000 | 19.60 | 14.72 | 24.10 | 9.38  | 2.39 |
| Laguna de la Roya      | 9000 | 19.66 | 14.24 | 24.92 | 10.68 | 2.72 |
| Lake Racou             | 9000 | 21.22 | 16.92 | 25.13 | 8.21  | 2.09 |
| Las Pardillas Lake     | 9000 | 23.01 | 18.42 | 27.12 | 8.70  | 2.22 |
| Navarres 1             | 9000 | 23.01 | 17.56 | 28.29 | 10.73 | 2.74 |
| Puerto de Los Tornos   | 9000 | 21.41 | 16.94 | 25.98 | 9.04  | 2.31 |
| Quintanar de la Sierra | 9000 | 23.37 | 19.23 | 27.43 | 8.20  | 2.09 |
| Sanabria Marsh         | 9000 | 20.55 | 15.50 | 25.15 | 9.65  | 2.46 |
| San Rafael             | 9000 | 25.62 | 21.73 | 29.29 | 7.56  | 1.93 |

Table 2: *(continued)*

| site                   | age   | value | lower | upper | range | se   |
|------------------------|-------|-------|-------|-------|-------|------|
| Santo Andre            | 9000  | 26.05 | 21.65 | 30.08 | 8.43  | 2.15 |
| Siles                  | 9000  | 25.76 | 21.61 | 29.13 | 7.52  | 1.92 |
| Padul                  | 9000  | 27.15 | 23.20 | 31.39 | 8.19  | 2.09 |
| Lourdes                | 9000  | 21.65 | 16.82 | 25.72 | 8.90  | 2.27 |
| Monge                  | 9000  | 19.81 | 14.46 | 24.92 | 10.46 | 2.67 |
| Moura                  | 9000  | 20.08 | 14.07 | 25.66 | 11.59 | 2.96 |
| Banyoles               | 9000  | 22.48 | 19.11 | 26.36 | 7.25  | 1.85 |
| Albufera Alcudia       | 10000 | 23.66 | 20.34 | 27.08 | 6.74  | 1.72 |
| cc17                   | 10000 | 22.63 | 17.73 | 26.81 | 9.08  | 2.32 |
| Charco da Candieira    | 10000 | 19.24 | 14.51 | 23.80 | 9.29  | 2.37 |
| Golfo                  | 10000 | 24.36 | 20.98 | 27.46 | 6.48  | 1.65 |
| Guadiana               | 10000 | 24.33 | 19.56 | 29.18 | 9.62  | 2.45 |
| Hoya del Castillo      | 10000 | 23.39 | 19.40 | 27.71 | 8.31  | 2.12 |
| Lago de Ajo            | 10000 | 19.52 | 14.42 | 24.19 | 9.77  | 2.49 |
| Laguna de la Roya      | 10000 | 19.68 | 13.88 | 25.21 | 11.33 | 2.89 |
| Lake Racou             | 10000 | 20.04 | 15.73 | 25.06 | 9.33  | 2.38 |
| Las Pardillas Lake     | 10000 | 22.97 | 18.75 | 27.18 | 8.43  | 2.15 |
| Navarres 1             | 10000 | 22.53 | 17.07 | 28.00 | 10.93 | 2.79 |
| Quintanar de la Sierra | 10000 | 22.94 | 18.37 | 26.69 | 8.32  | 2.12 |
| Sanabria Marsh         | 10000 | 22.42 | 18.00 | 26.04 | 8.04  | 2.05 |
| San Rafael             | 10000 | 25.16 | 20.81 | 29.39 | 8.58  | 2.19 |
| Santo Andre            | 10000 | 26.24 | 21.64 | 30.57 | 8.93  | 2.28 |
| Siles                  | 10000 | 26.68 | 21.89 | 29.64 | 7.75  | 1.98 |
| Padul                  | 10000 | 26.16 | 21.94 | 30.45 | 8.51  | 2.17 |
| Lourdes                | 10000 | 21.12 | 15.74 | 25.75 | 10.01 | 2.55 |
| Monge                  | 10000 | 19.74 | 14.17 | 25.18 | 11.01 | 2.81 |
| Moura                  | 10000 | 19.50 | 14.63 | 24.08 | 9.45  | 2.41 |
| Banyoles               | 10000 | 22.19 | 17.91 | 26.06 | 8.15  | 2.08 |
| Albufera Alcudia       | 11000 | 20.36 | 14.63 | 25.92 | 11.29 | 2.88 |
| cc17                   | 11000 | 22.40 | 17.52 | 27.19 | 9.67  | 2.47 |
| Charco da Candieira    | 11000 | 19.90 | 15.68 | 23.93 | 8.25  | 2.10 |
| Golfo                  | 11000 | 23.21 | 20.12 | 26.37 | 6.25  | 1.59 |
| Guadiana               | 11000 | 21.99 | 17.00 | 26.94 | 9.94  | 2.54 |
| Lago de Ajo            | 11000 | 19.56 | 13.99 | 24.68 | 10.69 | 2.73 |
| Laguna de la Roya      | 11000 | 20.82 | 15.47 | 25.81 | 10.34 | 2.64 |
| Lake Racou             | 11000 | 19.39 | 14.65 | 23.99 | 9.34  | 2.38 |
| Las Pardillas Lake     | 11000 | 22.87 | 18.61 | 26.02 | 7.41  | 1.89 |
| Navarres 1             | 11000 | 22.10 | 16.67 | 27.73 | 11.06 | 2.82 |
| Quintanar de la Sierra | 11000 | 20.63 | 16.07 | 25.01 | 8.94  | 2.28 |
| Sanabria Marsh         | 11000 | 21.45 | 16.93 | 26.24 | 9.31  | 2.37 |

Table 2: *(continued)*

| site                   | age   | value | lower | upper | range | se   |
|------------------------|-------|-------|-------|-------|-------|------|
| San Rafael             | 11000 | 25.09 | 20.49 | 29.63 | 9.14  | 2.33 |
| Santo Andre            | 11000 | 23.70 | 19.05 | 29.20 | 10.15 | 2.59 |
| Siles                  | 11000 | 26.27 | 23.13 | 29.14 | 6.01  | 1.53 |
| Padul                  | 11000 | 24.89 | 20.51 | 29.19 | 8.68  | 2.21 |
| Lourdes                | 11000 | 20.31 | 15.47 | 25.57 | 10.10 | 2.58 |
| Monge                  | 11000 | 19.95 | 14.78 | 24.95 | 10.17 | 2.59 |
| Moura                  | 11000 | 19.75 | 14.88 | 24.49 | 9.61  | 2.45 |
| Banyoles               | 11000 | 21.53 | 17.03 | 25.61 | 8.58  | 2.19 |
| cc17                   | 12000 | 19.45 | 14.48 | 24.96 | 10.48 | 2.67 |
| Charco da Candieira    | 12000 | 20.18 | 16.00 | 24.28 | 8.28  | 2.11 |
| Golfo                  | 12000 | 20.72 | 17.43 | 24.22 | 6.79  | 1.73 |
| Guadiana               | 12000 | 22.75 | 18.20 | 26.79 | 8.59  | 2.19 |
| Lago de Ajo            | 12000 | 19.77 | 14.22 | 25.04 | 10.82 | 2.76 |
| Laguna de la Roya      | 12000 | 20.74 | 16.30 | 24.96 | 8.66  | 2.21 |
| Lake Racou             | 12000 | 20.51 | 16.72 | 24.54 | 7.82  | 1.99 |
| Navarres 1             | 12000 | 21.74 | 16.36 | 27.47 | 11.11 | 2.83 |
| Quintanar de la Sierra | 12000 | 20.27 | 16.18 | 24.46 | 8.28  | 2.11 |
| Sanabria Marsh         | 12000 | 19.53 | 14.39 | 24.39 | 10.00 | 2.55 |
| San Rafael             | 12000 | 25.50 | 22.17 | 28.91 | 6.74  | 1.72 |
| Santo Andre            | 12000 | 20.97 | 15.79 | 27.27 | 11.48 | 2.93 |
| Siles                  | 12000 | 26.25 | 22.97 | 29.16 | 6.19  | 1.58 |
| Padul                  | 12000 | 23.13 | 19.31 | 27.06 | 7.75  | 1.98 |
| Lourdes                | 12000 | 19.68 | 14.18 | 24.84 | 10.66 | 2.72 |
| Monge                  | 12000 | 19.95 | 14.85 | 24.85 | 10.00 | 2.55 |
| Moura                  | 12000 | 20.82 | 15.19 | 26.11 | 10.92 | 2.79 |
| Banyoles               | 12000 | 20.57 | 15.51 | 25.39 | 9.88  | 2.52 |
| Charco da Candieira    | 13000 | 20.60 | 16.51 | 24.44 | 7.93  | 2.02 |
| Golfo                  | 13000 | 20.53 | 16.62 | 24.21 | 7.59  | 1.94 |
| Guadiana               | 13000 | 22.68 | 19.01 | 27.40 | 8.39  | 2.14 |
| Lago de Ajo            | 13000 | 19.83 | 14.73 | 24.82 | 10.09 | 2.57 |
| Laguna de la Roya      | 13000 | 20.96 | 15.73 | 25.22 | 9.49  | 2.42 |
| Navarres 1             | 13000 | 21.42 | 16.12 | 27.23 | 11.11 | 2.83 |
| Quintanar de la Sierra | 13000 | 21.55 | 17.19 | 25.63 | 8.44  | 2.15 |
| Sanabria Marsh         | 13000 | 18.94 | 14.09 | 24.32 | 10.23 | 2.61 |
| San Rafael             | 13000 | 25.37 | 21.45 | 29.25 | 7.80  | 1.99 |
| Santo Andre            | 13000 | 21.09 | 14.81 | 27.78 | 12.97 | 3.31 |
| Siles                  | 13000 | 25.08 | 21.50 | 28.66 | 7.16  | 1.83 |
| Padul                  | 13000 | 22.84 | 18.94 | 26.70 | 7.76  | 1.98 |
| Lourdes                | 13000 | 19.33 | 14.98 | 24.24 | 9.26  | 2.36 |
| Monge                  | 13000 | 18.98 | 14.94 | 24.64 | 9.70  | 2.47 |

Table 2: *(continued)*

| site                   | age   | value | lower | upper | range | se   |
|------------------------|-------|-------|-------|-------|-------|------|
| Banyoles               | 13000 | 20.11 | 14.77 | 25.33 | 10.56 | 2.69 |
| Charco da Candieira    | 14000 | 21.35 | 16.61 | 26.08 | 9.47  | 2.42 |
| Golfo                  | 14000 | 20.28 | 16.17 | 24.34 | 8.17  | 2.08 |
| Lago de Ajo            | 14000 | 20.12 | 15.17 | 25.02 | 9.85  | 2.51 |
| Laguna de la Roya      | 14000 | 22.07 | 16.99 | 26.37 | 9.38  | 2.39 |
| Navarres 1             | 14000 | 21.15 | 15.94 | 27.00 | 11.06 | 2.82 |
| Quintanar de la Sierra | 14000 | 20.12 | 15.48 | 24.56 | 9.08  | 2.32 |
| Sanabria Marsh         | 14000 | 20.28 | 15.69 | 24.04 | 8.35  | 2.13 |
| San Rafael             | 14000 | 25.79 | 21.17 | 30.38 | 9.21  | 2.35 |
| Santo Andre            | 14000 | 22.25 | 15.86 | 29.31 | 13.45 | 3.43 |
| Siles                  | 14000 | 24.82 | 20.93 | 28.50 | 7.57  | 1.93 |
| Padul                  | 14000 | 24.86 | 20.46 | 28.64 | 8.18  | 2.09 |
| Lourdes                | 14000 | 20.28 | 15.31 | 24.72 | 9.41  | 2.40 |
| Monge                  | 14000 | 20.59 | 14.93 | 26.61 | 11.68 | 2.98 |
| Banyoles               | 14000 | 20.91 | 15.44 | 26.20 | 10.76 | 2.74 |
| Lago de Ajo            | 15000 | 20.34 | 15.40 | 25.38 | 9.98  | 2.55 |
| Laguna de la Roya      | 15000 | 21.78 | 17.16 | 25.87 | 8.71  | 2.22 |
| Navarres 1             | 15000 | 20.90 | 15.81 | 26.78 | 10.97 | 2.80 |
| Quintanar de la Sierra | 15000 | 20.10 | 15.88 | 24.32 | 8.44  | 2.15 |
| San Rafael             | 15000 | 26.30 | 21.44 | 31.05 | 9.61  | 2.45 |
| Santo Andre            | 15000 | 20.91 | 14.77 | 27.04 | 12.27 | 3.13 |
| Siles                  | 15000 | 25.26 | 21.59 | 28.19 | 6.60  | 1.68 |
| Padul                  | 15000 | 22.04 | 17.18 | 26.84 | 9.66  | 2.46 |
| Lourdes                | 15000 | 19.63 | 14.48 | 25.30 | 10.82 | 2.76 |
| Banyoles               | 15000 | 21.30 | 15.48 | 27.07 | 11.59 | 2.96 |

Table 3: Annual precipitation

| site                   | age  | value   | lower   | upper   | range  | se    |
|------------------------|------|---------|---------|---------|--------|-------|
| Albufera Alcudia       | 1000 | 980.67  | 874.17  | 1098.02 | 223.85 | 57.10 |
| Algendar               | 1000 | 967.62  | 835.49  | 1093.10 | 257.61 | 65.72 |
| Antas                  | 1000 | 835.01  | 751.14  | 931.88  | 180.74 | 46.11 |
| Barbaroxa              | 1000 | 1033.29 | 948.10  | 1128.22 | 180.12 | 45.95 |
| Cala Galdana           | 1000 | 845.68  | 755.29  | 955.17  | 199.88 | 50.99 |
| cc17                   | 1000 | 1098.66 | 993.61  | 1223.08 | 229.47 | 58.54 |
| Charco da Candieira    | 1000 | 1078.72 | 996.47  | 1185.26 | 188.79 | 48.16 |
| Gador                  | 1000 | 1019.78 | 950.32  | 1099.45 | 149.13 | 38.04 |
| Golfo                  | 1000 | 1023.73 | 946.45  | 1107.00 | 160.55 | 40.96 |
| Lago de Ajo            | 1000 | 1126.27 | 1024.19 | 1268.39 | 244.20 | 62.30 |
| Laguna de la Roya      | 1000 | 1190.47 | 1057.54 | 1340.81 | 283.27 | 72.26 |
| Lake Racou             | 1000 | 1094.46 | 1007.21 | 1191.49 | 184.28 | 47.01 |
| Las Pardillas Lake     | 1000 | 1090.63 | 996.00  | 1210.14 | 214.14 | 54.63 |
| Puerto de Belate       | 1000 | 1166.97 | 1061.09 | 1261.34 | 200.25 | 51.08 |
| Puerto de Los Tornos   | 1000 | 1125.48 | 1027.68 | 1232.86 | 205.18 | 52.34 |
| Quintanar de la Sierra | 1000 | 1025.46 | 923.84  | 1138.58 | 214.74 | 54.78 |
| Saldropo               | 1000 | 1133.58 | 1025.21 | 1260.86 | 235.65 | 60.11 |
| Sanabria Marsh         | 1000 | 1225.73 | 1111.75 | 1372.22 | 260.47 | 66.45 |
| San Rafael             | 1000 | 1025.08 | 920.23  | 1136.50 | 216.27 | 55.17 |
| Santo Andre            | 1000 | 1062.22 | 949.74  | 1190.15 | 240.41 | 61.33 |
| Siles                  | 1000 | 935.77  | 857.58  | 1030.51 | 172.93 | 44.11 |
| Lourdes                | 1000 | 1157.47 | 1040.82 | 1293.71 | 252.89 | 64.51 |
| Monge                  | 1000 | 1121.69 | 1022.01 | 1233.67 | 211.66 | 53.99 |
| Banyoles               | 1000 | 1136.26 | 1042.02 | 1233.45 | 191.43 | 48.83 |
| Albufera Alcudia       | 2000 | 1051.01 | 939.90  | 1168.63 | 228.73 | 58.35 |
| Algendar               | 2000 | 1039.23 | 933.41  | 1150.76 | 217.35 | 55.45 |
| Antas                  | 2000 | 854.58  | 754.69  | 971.05  | 216.36 | 55.19 |
| Barbaroxa              | 2000 | 1072.23 | 992.30  | 1174.05 | 181.75 | 46.36 |
| Cala Galdana           | 2000 | 973.06  | 887.64  | 1077.20 | 189.56 | 48.36 |
| cc17                   | 2000 | 1099.49 | 996.30  | 1213.20 | 216.90 | 55.33 |
| Charco da Candieira    | 2000 | 1108.07 | 1023.77 | 1217.25 | 193.48 | 49.36 |
| Gador                  | 2000 | 931.64  | 852.18  | 1009.16 | 156.98 | 40.05 |
| Golfo                  | 2000 | 1054.32 | 981.07  | 1135.62 | 154.55 | 39.43 |
| Lago de Ajo            | 2000 | 1190.03 | 1082.21 | 1330.95 | 248.74 | 63.45 |
| Laguna de la Roya      | 2000 | 1230.65 | 1111.09 | 1390.44 | 279.35 | 71.26 |
| Lake Racou             | 2000 | 1124.17 | 1036.89 | 1221.08 | 184.19 | 46.99 |
| Las Pardillas Lake     | 2000 | 1110.94 | 1009.52 | 1231.15 | 221.63 | 56.54 |
| Puerto de Belate       | 2000 | 1176.81 | 1076.16 | 1280.44 | 204.28 | 52.11 |
| Puerto de Los Tornos   | 2000 | 1119.80 | 1022.31 | 1225.89 | 203.58 | 51.93 |
| Quintanar de la Sierra | 2000 | 1119.98 | 1019.84 | 1231.77 | 211.93 | 54.06 |

Table 3: (continued)

| site                   | age  | value   | lower   | upper   | range  | se    |
|------------------------|------|---------|---------|---------|--------|-------|
| Roquetas de Mar        | 2000 | 1049.45 | 923.83  | 1205.72 | 281.89 | 71.91 |
| Saldropo               | 2000 | 1133.36 | 1037.64 | 1250.43 | 212.79 | 54.28 |
| Sanabria Marsh         | 2000 | 1179.60 | 1066.26 | 1329.21 | 262.95 | 67.08 |
| San Rafael             | 2000 | 1023.80 | 905.47  | 1161.09 | 255.62 | 65.21 |
| Santo Andre            | 2000 | 1085.64 | 977.08  | 1195.59 | 218.51 | 55.74 |
| Siles                  | 2000 | 929.17  | 848.78  | 1022.87 | 174.09 | 44.41 |
| Lourdes                | 2000 | 1145.80 | 1059.42 | 1240.85 | 181.43 | 46.28 |
| Monge                  | 2000 | 1108.96 | 1025.80 | 1220.59 | 194.79 | 49.69 |
| Banyoles               | 2000 | 1123.59 | 1029.46 | 1234.11 | 204.65 | 52.21 |
| Albufera Alcudia       | 3000 | 1025.75 | 935.31  | 1137.66 | 202.35 | 51.62 |
| Algendar               | 3000 | 940.70  | 843.86  | 1044.15 | 200.29 | 51.09 |
| Antas                  | 3000 | 726.31  | 641.36  | 824.64  | 183.28 | 46.76 |
| Barbaroxa              | 3000 | 1080.85 | 995.23  | 1188.82 | 193.59 | 49.39 |
| Cala Galdana           | 3000 | 1023.49 | 939.02  | 1125.64 | 186.62 | 47.61 |
| cc17                   | 3000 | 1082.28 | 981.57  | 1194.74 | 213.17 | 54.38 |
| Charco da Candieira    | 3000 | 1128.67 | 1036.58 | 1229.59 | 193.01 | 49.24 |
| Gador                  | 3000 | 970.03  | 890.83  | 1054.17 | 163.34 | 41.67 |
| Golfo                  | 3000 | 1017.35 | 950.18  | 1093.91 | 143.73 | 36.67 |
| Guadiana               | 3000 | 986.99  | 919.31  | 1058.35 | 139.04 | 35.47 |
| Lago de Ajo            | 3000 | 1206.07 | 1091.94 | 1338.96 | 247.02 | 63.02 |
| Laguna de la Roya      | 3000 | 1246.03 | 1110.84 | 1405.66 | 294.82 | 75.21 |
| Lake Racou             | 3000 | 1119.11 | 1035.44 | 1211.01 | 175.57 | 44.79 |
| Las Pardillas Lake     | 3000 | 1109.08 | 1013.06 | 1230.54 | 217.48 | 55.48 |
| Puerto de Belate       | 3000 | 1150.93 | 1062.64 | 1262.53 | 199.89 | 50.99 |
| Puerto de Los Tornos   | 3000 | 1131.72 | 1036.23 | 1242.89 | 206.66 | 52.72 |
| Quintanar de la Sierra | 3000 | 1109.93 | 1007.70 | 1236.40 | 228.70 | 58.34 |
| Roquetas de Mar        | 3000 | 1021.92 | 912.28  | 1163.11 | 250.83 | 63.99 |
| Saldropo               | 3000 | 1144.32 | 1045.60 | 1258.18 | 212.58 | 54.23 |
| Sanabria Marsh         | 3000 | 1226.74 | 1092.76 | 1401.16 | 308.40 | 78.67 |
| San Rafael             | 3000 | 958.21  | 836.67  | 1112.28 | 275.61 | 70.31 |
| Santo Andre            | 3000 | 1082.73 | 978.32  | 1210.51 | 232.19 | 59.23 |
| Siles                  | 3000 | 903.30  | 823.35  | 987.19  | 163.84 | 41.80 |
| Lourdes                | 3000 | 1169.62 | 1053.57 | 1286.02 | 232.45 | 59.30 |
| Monge                  | 3000 | 1155.23 | 1062.72 | 1271.17 | 208.45 | 53.18 |
| Banyoles               | 3000 | 1117.08 | 1028.29 | 1229.18 | 200.89 | 51.25 |
| Albufera Alcudia       | 4000 | 1050.77 | 945.46  | 1145.44 | 199.98 | 51.02 |
| Algendar               | 4000 | 974.08  | 893.36  | 1076.85 | 183.49 | 46.81 |
| Antas                  | 4000 | 692.39  | 575.81  | 836.62  | 260.81 | 66.53 |
| Barbaroxa              | 4000 | 1041.01 | 959.54  | 1129.81 | 170.27 | 43.44 |
| Cala Galdana           | 4000 | 931.32  | 843.48  | 1016.98 | 173.50 | 44.26 |

Table 3: *(continued)*

| site                   | age  | value   | lower   | upper   | range  | se    |
|------------------------|------|---------|---------|---------|--------|-------|
| Cala n” Porter         | 4000 | 922.13  | 839.11  | 999.71  | 160.60 | 40.97 |
| cc17                   | 4000 | 1055.38 | 953.05  | 1179.72 | 226.67 | 57.82 |
| Charco da Candieira    | 4000 | 1148.40 | 1036.22 | 1276.75 | 240.53 | 61.36 |
| Gador                  | 4000 | 890.18  | 825.79  | 976.72  | 150.93 | 38.50 |
| Golfo                  | 4000 | 1016.14 | 944.67  | 1084.82 | 140.15 | 35.75 |
| Guadiana               | 4000 | 926.86  | 866.21  | 998.00  | 131.79 | 33.62 |
| Lago de Ajo            | 4000 | 1202.10 | 1092.38 | 1326.68 | 234.30 | 59.77 |
| Laguna de la Roya      | 4000 | 1239.88 | 1091.06 | 1383.92 | 292.86 | 74.71 |
| Lake Racou             | 4000 | 1145.09 | 1065.24 | 1247.65 | 182.41 | 46.53 |
| Las Pardillas Lake     | 4000 | 1193.46 | 1052.19 | 1331.59 | 279.40 | 71.28 |
| Navarres 1             | 4000 | 1003.51 | 921.64  | 1144.95 | 223.31 | 56.97 |
| Puerto de Belate       | 4000 | 1268.20 | 1155.43 | 1403.13 | 247.70 | 63.19 |
| Puerto de Los Tornos   | 4000 | 1129.63 | 1043.90 | 1251.76 | 207.86 | 53.03 |
| Quintanar de la Sierra | 4000 | 1142.84 | 1011.79 | 1287.29 | 275.50 | 70.28 |
| Roquetas de Mar        | 4000 | 1014.15 | 909.60  | 1141.02 | 231.42 | 59.04 |
| Saldropo               | 4000 | 1159.14 | 1055.41 | 1273.45 | 218.04 | 55.62 |
| Sanabria Marsh         | 4000 | 1206.45 | 1075.71 | 1374.57 | 298.86 | 76.24 |
| San Rafael             | 4000 | 1117.24 | 967.54  | 1310.02 | 342.48 | 87.37 |
| Santo Andre            | 4000 | 1107.46 | 1002.82 | 1232.18 | 229.36 | 58.51 |
| Siles                  | 4000 | 921.43  | 836.48  | 1022.69 | 186.21 | 47.50 |
| Lourdes                | 4000 | 1168.21 | 1075.57 | 1284.91 | 209.34 | 53.40 |
| Monge                  | 4000 | 1162.96 | 1063.77 | 1287.49 | 223.72 | 57.07 |
| Moura                  | 4000 | 1129.79 | 1041.74 | 1227.17 | 185.43 | 47.30 |
| Banyoles               | 4000 | 1134.20 | 1041.39 | 1241.54 | 200.15 | 51.06 |
| Albufera Alcudia       | 5000 | 1071.83 | 971.81  | 1163.53 | 191.72 | 48.91 |
| Algendar               | 5000 | 1011.40 | 923.91  | 1103.61 | 179.70 | 45.84 |
| Antas                  | 5000 | 753.13  | 578.01  | 893.08  | 315.07 | 80.38 |
| Barbaroxa              | 5000 | 1012.75 | 921.55  | 1095.48 | 173.93 | 44.37 |
| Cala Galdana           | 5000 | 957.24  | 882.43  | 1055.75 | 173.32 | 44.21 |
| Cala n” Porter         | 5000 | 963.21  | 862.10  | 1070.64 | 208.54 | 53.20 |
| cc17                   | 5000 | 1061.77 | 954.02  | 1200.69 | 246.67 | 62.93 |
| Charco da Candieira    | 5000 | 1141.69 | 1045.15 | 1265.02 | 219.87 | 56.09 |
| Gador                  | 5000 | 903.67  | 823.93  | 991.27  | 167.34 | 42.69 |
| Golfo                  | 5000 | 1023.16 | 943.63  | 1094.76 | 151.13 | 38.55 |
| Guadiana               | 5000 | 950.69  | 885.08  | 1029.90 | 144.82 | 36.94 |
| Lago de Ajo            | 5000 | 1238.96 | 1123.59 | 1380.41 | 256.82 | 65.52 |
| Laguna de la Roya      | 5000 | 1230.98 | 1098.69 | 1411.48 | 312.79 | 79.79 |
| Lake Racou             | 5000 | 1160.52 | 1069.42 | 1259.62 | 190.20 | 48.52 |
| Las Pardillas Lake     | 5000 | 1164.83 | 1033.19 | 1299.67 | 266.48 | 67.98 |
| Navarres 1             | 5000 | 1033.18 | 926.64  | 1171.91 | 245.27 | 62.57 |

Table 3: *(continued)*

| site                   | age  | value   | lower   | upper   | range  | se    |
|------------------------|------|---------|---------|---------|--------|-------|
| Puerto de Belate       | 5000 | 1160.33 | 1064.04 | 1286.87 | 222.83 | 56.84 |
| Puerto de Los Tornos   | 5000 | 1162.22 | 1065.04 | 1289.56 | 224.52 | 57.28 |
| Quintanar de la Sierra | 5000 | 1145.09 | 1021.95 | 1303.50 | 281.55 | 71.82 |
| Roquetas de Mar        | 5000 | 944.75  | 856.74  | 1044.21 | 187.47 | 47.82 |
| Saldropo               | 5000 | 1159.68 | 1055.26 | 1276.73 | 221.47 | 56.50 |
| Sanabria Marsh         | 5000 | 1189.51 | 1044.03 | 1344.37 | 300.34 | 76.62 |
| San Rafael             | 5000 | 990.02  | 900.14  | 1094.30 | 194.16 | 49.53 |
| Santo Andre            | 5000 | 1097.45 | 991.50  | 1207.66 | 216.16 | 55.14 |
| Siles                  | 5000 | 937.75  | 846.06  | 1056.79 | 210.73 | 53.76 |
| Padul                  | 5000 | 1036.92 | 939.57  | 1136.95 | 197.38 | 50.35 |
| Lourdes                | 5000 | 1308.31 | 1166.80 | 1467.33 | 300.53 | 76.67 |
| Monge                  | 5000 | 1304.08 | 1191.80 | 1434.17 | 242.37 | 61.83 |
| Moura                  | 5000 | 1287.75 | 1160.20 | 1427.32 | 267.12 | 68.14 |
| Banyoles               | 5000 | 1148.08 | 1041.80 | 1270.79 | 228.99 | 58.42 |
| Albufera Alcudia       | 6000 | 1060.72 | 977.80  | 1162.47 | 184.67 | 47.11 |
| Algendar               | 6000 | 1045.49 | 949.85  | 1159.91 | 210.06 | 53.59 |
| Antas                  | 6000 | 824.80  | 630.82  | 933.26  | 302.44 | 77.15 |
| Barbaroxa              | 6000 | 1035.31 | 951.52  | 1145.52 | 194.00 | 49.49 |
| Cala Galdana           | 6000 | 850.93  | 785.88  | 956.42  | 170.54 | 43.51 |
| Cala n" Porter         | 6000 | 1058.25 | 977.23  | 1145.67 | 168.44 | 42.97 |
| cc17                   | 6000 | 1066.77 | 959.47  | 1202.78 | 243.31 | 62.07 |
| Charco da Candieira    | 6000 | 1107.70 | 1022.09 | 1200.99 | 178.90 | 45.64 |
| Gador                  | 6000 | 962.46  | 906.43  | 1035.76 | 129.33 | 32.99 |
| Golfo                  | 6000 | 1001.97 | 925.13  | 1085.77 | 160.64 | 40.98 |
| Guadiana               | 6000 | 948.58  | 879.76  | 1022.65 | 142.89 | 36.45 |
| Hoya del Castilho      | 6000 | 1119.20 | 990.61  | 1280.52 | 289.91 | 73.96 |
| Lago de Ajo            | 6000 | 1253.47 | 1129.99 | 1408.66 | 278.67 | 71.09 |
| Laguna de la Roya      | 6000 | 1232.23 | 1098.02 | 1406.00 | 307.98 | 78.57 |
| Lake Racou             | 6000 | 1173.99 | 1085.58 | 1290.20 | 204.62 | 52.20 |
| Las Pardillas Lake     | 6000 | 1173.13 | 1057.13 | 1319.21 | 262.08 | 66.86 |
| Navarres 1             | 6000 | 1063.68 | 932.75  | 1200.04 | 267.29 | 68.19 |
| Puerto de Belate       | 6000 | 1195.45 | 1097.57 | 1310.93 | 213.36 | 54.43 |
| Puerto de Los Tornos   | 6000 | 1144.50 | 1049.83 | 1268.36 | 218.53 | 55.75 |
| Quintanar de la Sierra | 6000 | 1146.67 | 1018.48 | 1313.14 | 294.66 | 75.17 |
| Roquetas de Mar        | 6000 | 956.89  | 865.70  | 1070.22 | 204.52 | 52.17 |
| Saldropo               | 6000 | 1159.84 | 1064.88 | 1285.54 | 220.66 | 56.29 |
| Sanabria Marsh         | 6000 | 1203.63 | 1068.76 | 1370.22 | 301.46 | 76.90 |
| San Rafael             | 6000 | 939.50  | 857.97  | 1034.90 | 176.93 | 45.14 |
| Santo Andre            | 6000 | 1114.17 | 985.61  | 1244.91 | 259.30 | 66.15 |
| Siles                  | 6000 | 947.97  | 851.68  | 1027.97 | 176.29 | 44.97 |

Table 3: *(continued)*

| site                   | age  | value   | lower   | upper   | range  | se    |
|------------------------|------|---------|---------|---------|--------|-------|
| Padul                  | 6000 | 956.44  | 870.68  | 1071.97 | 201.29 | 51.35 |
| Lourdes                | 6000 | 1270.19 | 1090.41 | 1453.36 | 362.95 | 92.59 |
| Monge                  | 6000 | 1286.78 | 1151.46 | 1443.43 | 291.97 | 74.48 |
| Moura                  | 6000 | 1171.04 | 1039.91 | 1344.09 | 304.18 | 77.60 |
| Banyoles               | 6000 | 1125.23 | 1007.17 | 1276.16 | 268.99 | 68.62 |
| Albufera Alcudia       | 7000 | 1066.65 | 987.43  | 1168.67 | 181.24 | 46.23 |
| Algendar               | 7000 | 1067.57 | 967.80  | 1191.79 | 223.99 | 57.14 |
| Antas                  | 7000 | 814.78  | 713.66  | 905.06  | 191.40 | 48.83 |
| Barbaroxa              | 7000 | 1030.95 | 928.70  | 1126.37 | 197.67 | 50.43 |
| Cala Galdana           | 7000 | 1072.19 | 939.24  | 1197.54 | 258.30 | 65.89 |
| Cala n" Porter         | 7000 | 1075.62 | 985.83  | 1194.15 | 208.32 | 53.14 |
| cc17                   | 7000 | 1062.81 | 967.11  | 1194.28 | 227.17 | 57.95 |
| Charco da Candieira    | 7000 | 1135.70 | 1046.65 | 1238.56 | 191.91 | 48.96 |
| Golfo                  | 7000 | 966.76  | 903.10  | 1054.19 | 151.09 | 38.54 |
| Guadiana               | 7000 | 1007.30 | 932.76  | 1086.83 | 154.07 | 39.30 |
| Hoya del Castilho      | 7000 | 1122.74 | 988.81  | 1286.45 | 297.64 | 75.93 |
| Lago de Ajo            | 7000 | 1260.57 | 1130.96 | 1420.67 | 289.71 | 73.91 |
| Laguna de la Roya      | 7000 | 1246.35 | 1114.92 | 1417.05 | 302.13 | 77.07 |
| Lake Racou             | 7000 | 1149.81 | 1063.79 | 1260.56 | 196.77 | 50.20 |
| Las Pardillas Lake     | 7000 | 1198.91 | 1069.46 | 1327.68 | 258.22 | 65.87 |
| Navarres 1             | 7000 | 1094.52 | 940.15  | 1228.73 | 288.58 | 73.62 |
| Puerto de Belate       | 7000 | 1145.89 | 1034.28 | 1279.96 | 245.68 | 62.67 |
| Puerto de Los Tornos   | 7000 | 1126.03 | 1020.39 | 1271.47 | 251.08 | 64.05 |
| Quintanar de la Sierra | 7000 | 1147.41 | 1017.69 | 1304.52 | 286.83 | 73.17 |
| Saldropo               | 7000 | 1158.92 | 1027.32 | 1338.43 | 311.11 | 79.36 |
| Sanabria Marsh         | 7000 | 1169.75 | 1038.35 | 1325.14 | 286.79 | 73.16 |
| San Rafael             | 7000 | 938.08  | 861.44  | 1031.50 | 170.06 | 43.38 |
| Santo Andre            | 7000 | 1089.67 | 957.66  | 1229.24 | 271.58 | 69.28 |
| Siles                  | 7000 | 1058.25 | 955.21  | 1183.87 | 228.66 | 58.33 |
| Padul                  | 7000 | 977.20  | 891.63  | 1081.31 | 189.68 | 48.39 |
| Lourdes                | 7000 | 1258.65 | 1106.05 | 1446.66 | 340.61 | 86.89 |
| Monge                  | 7000 | 1248.53 | 1105.77 | 1434.06 | 328.29 | 83.75 |
| Moura                  | 7000 | 1220.59 | 1090.52 | 1344.40 | 253.88 | 64.77 |
| Banyoles               | 7000 | 1123.82 | 1025.75 | 1268.07 | 242.32 | 61.82 |
| Albufera Alcudia       | 8000 | 1055.28 | 980.06  | 1159.48 | 179.42 | 45.77 |
| Algendar               | 8000 | 1058.17 | 960.33  | 1187.19 | 226.86 | 57.87 |
| Antas                  | 8000 | 795.84  | 732.79  | 885.71  | 152.92 | 39.01 |
| Cala Galdana           | 8000 | 1091.47 | 989.63  | 1209.34 | 219.71 | 56.05 |
| Cala n" Porter         | 8000 | 1085.75 | 997.01  | 1199.01 | 202.00 | 51.53 |
| cc17                   | 8000 | 1077.09 | 967.28  | 1206.80 | 239.52 | 61.10 |

Table 3: *(continued)*

| site                   | age  | value   | lower   | upper   | range  | se    |
|------------------------|------|---------|---------|---------|--------|-------|
| Charco da Candieira    | 8000 | 1148.12 | 1050.78 | 1286.31 | 235.53 | 60.08 |
| Golfo                  | 8000 | 996.25  | 932.35  | 1097.27 | 164.92 | 42.07 |
| Guadiana               | 8000 | 977.57  | 897.14  | 1055.07 | 157.93 | 40.29 |
| Hoya del Castilho      | 8000 | 1096.73 | 986.12  | 1240.07 | 253.95 | 64.78 |
| Lago de Ajo            | 8000 | 1264.13 | 1134.06 | 1430.69 | 296.63 | 75.67 |
| Laguna de la Roya      | 8000 | 1237.08 | 1098.59 | 1416.53 | 317.94 | 81.11 |
| Lake Racou             | 8000 | 1151.09 | 1058.49 | 1249.56 | 191.07 | 48.74 |
| Las Pardillas Lake     | 8000 | 1167.14 | 1039.92 | 1313.40 | 273.48 | 69.77 |
| Navarres 1             | 8000 | 1124.22 | 948.29  | 1256.57 | 308.28 | 78.64 |
| Puerto de Belate       | 8000 | 1165.55 | 1058.00 | 1300.16 | 242.16 | 61.78 |
| Puerto de Los Tornos   | 8000 | 1179.91 | 1044.44 | 1336.40 | 291.96 | 74.48 |
| Quintanar de la Sierra | 8000 | 1152.38 | 1018.07 | 1300.66 | 282.59 | 72.09 |
| Saldropo               | 8000 | 1123.24 | 982.67  | 1286.95 | 304.28 | 77.62 |
| Sanabria Marsh         | 8000 | 1219.21 | 1076.71 | 1359.40 | 282.69 | 72.11 |
| San Rafael             | 8000 | 907.45  | 833.30  | 990.40  | 157.10 | 40.08 |
| Santo Andre            | 8000 | 1023.25 | 899.04  | 1142.19 | 243.15 | 62.03 |
| Siles                  | 8000 | 1004.74 | 891.07  | 1139.95 | 248.88 | 63.49 |
| Padul                  | 8000 | 1003.17 | 908.87  | 1126.54 | 217.67 | 55.53 |
| Lourdes                | 8000 | 1267.20 | 1105.90 | 1439.96 | 334.06 | 85.22 |
| Monge                  | 8000 | 1264.59 | 1101.92 | 1446.97 | 345.05 | 88.02 |
| Moura                  | 8000 | 1234.01 | 1101.91 | 1387.72 | 285.81 | 72.91 |
| Banyoles               | 8000 | 1125.27 | 1041.94 | 1251.38 | 209.44 | 53.43 |
| Albufera Alcudia       | 9000 | 1066.55 | 977.81  | 1158.18 | 180.37 | 46.01 |
| Algendar               | 9000 | 1091.28 | 980.41  | 1221.53 | 241.12 | 61.51 |
| Antas                  | 9000 | 801.39  | 733.01  | 878.83  | 145.82 | 37.20 |
| Cala n" Porter         | 9000 | 1068.61 | 968.23  | 1189.18 | 220.95 | 56.36 |
| cc17                   | 9000 | 1085.43 | 972.91  | 1198.66 | 225.75 | 57.59 |
| Charco da Candieira    | 9000 | 1189.70 | 1072.07 | 1336.28 | 264.21 | 67.40 |
| Golfo                  | 9000 | 1065.63 | 986.92  | 1185.81 | 198.89 | 50.74 |
| Guadiana               | 9000 | 922.30  | 842.54  | 1001.47 | 158.93 | 40.54 |
| Hoya del Castilho      | 9000 | 1109.61 | 1000.28 | 1244.46 | 244.18 | 62.29 |
| Lago de Ajo            | 9000 | 1280.76 | 1144.98 | 1436.28 | 291.30 | 74.31 |
| Laguna de la Roya      | 9000 | 1255.34 | 1094.75 | 1428.43 | 333.68 | 85.12 |
| Lake Racou             | 9000 | 1171.77 | 1066.14 | 1296.81 | 230.67 | 58.84 |
| Las Pardillas Lake     | 9000 | 1203.90 | 1049.62 | 1329.84 | 280.22 | 71.48 |
| Navarres 1             | 9000 | 1150.93 | 956.37  | 1282.13 | 325.76 | 83.10 |
| Puerto de Los Tornos   | 9000 | 1187.26 | 1016.17 | 1306.90 | 290.73 | 74.17 |
| Quintanar de la Sierra | 9000 | 1142.04 | 1006.52 | 1278.20 | 271.68 | 69.31 |
| Sanabria Marsh         | 9000 | 1205.76 | 1078.33 | 1374.78 | 296.45 | 75.63 |
| San Rafael             | 9000 | 999.72  | 907.81  | 1108.98 | 201.17 | 51.32 |

Table 3: (continued)

| site                   | age   | value   | lower   | upper   | range  | se    |
|------------------------|-------|---------|---------|---------|--------|-------|
| Santo Andre            | 9000  | 1006.27 | 867.24  | 1114.75 | 247.51 | 63.14 |
| Siles                  | 9000  | 950.85  | 845.97  | 1072.06 | 226.09 | 57.68 |
| Padul                  | 9000  | 964.84  | 862.53  | 1094.07 | 231.54 | 59.07 |
| Lourdes                | 9000  | 1244.67 | 1070.45 | 1378.74 | 308.29 | 78.65 |
| Monge                  | 9000  | 1253.66 | 1096.20 | 1444.43 | 348.23 | 88.83 |
| Moura                  | 9000  | 1238.73 | 1077.19 | 1436.38 | 359.19 | 91.63 |
| Banyoles               | 9000  | 1115.31 | 1021.21 | 1235.46 | 214.25 | 54.66 |
| Albufera Alcudia       | 10000 | 1079.15 | 980.81  | 1172.31 | 191.50 | 48.85 |
| cc17                   | 10000 | 1101.19 | 994.74  | 1257.78 | 263.04 | 67.10 |
| Charco da Candieira    | 10000 | 1281.54 | 1145.48 | 1449.18 | 303.70 | 77.47 |
| Golfo                  | 10000 | 1107.27 | 1013.37 | 1234.00 | 220.63 | 56.28 |
| Guadiana               | 10000 | 974.30  | 864.59  | 1113.05 | 248.46 | 63.38 |
| Hoya del Castilho      | 10000 | 1165.67 | 1025.34 | 1317.54 | 292.20 | 74.54 |
| Lago de Ajo            | 10000 | 1281.31 | 1133.32 | 1442.98 | 309.66 | 78.99 |
| Laguna de la Roya      | 10000 | 1257.79 | 1068.25 | 1415.97 | 347.72 | 88.70 |
| Lake Racou             | 10000 | 1216.76 | 1077.21 | 1337.26 | 260.05 | 66.34 |
| Las Pardillas Lake     | 10000 | 1161.15 | 1032.59 | 1286.73 | 254.14 | 64.83 |
| Navarres 1             | 10000 | 1173.61 | 963.94  | 1304.80 | 340.86 | 86.95 |
| Quintanar de la Sierra | 10000 | 1114.00 | 1004.91 | 1272.04 | 267.13 | 68.15 |
| Sanabria Marsh         | 10000 | 1184.00 | 1075.69 | 1323.35 | 247.66 | 63.18 |
| San Rafael             | 10000 | 1038.09 | 931.88  | 1163.19 | 231.31 | 59.01 |
| Santo Andre            | 10000 | 1023.91 | 866.95  | 1148.41 | 281.46 | 71.80 |
| Siles                  | 10000 | 935.17  | 847.03  | 1082.86 | 235.83 | 60.16 |
| Padul                  | 10000 | 1000.68 | 884.61  | 1117.18 | 232.57 | 59.33 |
| Lourdes                | 10000 | 1246.79 | 1067.22 | 1389.68 | 322.46 | 82.26 |
| Monge                  | 10000 | 1237.48 | 1085.43 | 1442.07 | 356.64 | 90.98 |
| Moura                  | 10000 | 1206.55 | 1084.07 | 1362.46 | 278.39 | 71.02 |
| Banyoles               | 10000 | 1111.99 | 1009.22 | 1240.93 | 231.71 | 59.11 |
| Albufera Alcudia       | 11000 | 1187.78 | 1018.39 | 1347.24 | 328.85 | 83.89 |
| cc17                   | 11000 | 1103.45 | 975.35  | 1254.38 | 279.03 | 71.18 |
| Charco da Candieira    | 11000 | 1220.09 | 1103.18 | 1367.95 | 264.77 | 67.54 |
| Golfo                  | 11000 | 1111.11 | 1026.76 | 1218.31 | 191.55 | 48.86 |
| Guadiana               | 11000 | 1129.79 | 1008.48 | 1290.63 | 282.15 | 71.98 |
| Lago de Ajo            | 11000 | 1265.92 | 1105.33 | 1447.48 | 342.15 | 87.28 |
| Laguna de la Roya      | 11000 | 1171.48 | 1030.01 | 1341.84 | 311.83 | 79.55 |
| Lake Racou             | 11000 | 1225.34 | 1099.21 | 1402.39 | 303.18 | 77.34 |
| Las Pardillas Lake     | 11000 | 1209.92 | 1077.25 | 1364.26 | 287.01 | 73.22 |
| Navarres 1             | 11000 | 1191.95 | 970.91  | 1324.65 | 353.74 | 90.24 |
| Quintanar de la Sierra | 11000 | 1181.17 | 1057.91 | 1337.75 | 279.84 | 71.39 |
| Sanabria Marsh         | 11000 | 1195.18 | 1054.47 | 1347.37 | 292.90 | 74.72 |

Table 3: (continued)

| site                   | age   | value   | lower   | upper   | range  | se    |
|------------------------|-------|---------|---------|---------|--------|-------|
| San Rafael             | 11000 | 1050.75 | 936.87  | 1186.15 | 249.28 | 63.59 |
| Santo Andre            | 11000 | 1049.39 | 894.40  | 1207.73 | 313.33 | 79.93 |
| Siles                  | 11000 | 907.23  | 839.03  | 993.98  | 154.95 | 39.53 |
| Padul                  | 11000 | 1037.18 | 928.37  | 1158.60 | 230.23 | 58.73 |
| Lourdes                | 11000 | 1213.10 | 1071.13 | 1397.43 | 326.30 | 83.24 |
| Monge                  | 11000 | 1170.56 | 1032.44 | 1366.86 | 334.42 | 85.31 |
| Moura                  | 11000 | 1202.48 | 1063.45 | 1375.56 | 312.11 | 79.62 |
| Banyoles               | 11000 | 1131.01 | 1016.13 | 1259.20 | 243.07 | 62.01 |
| cc17                   | 12000 | 1266.67 | 1076.50 | 1413.21 | 336.71 | 85.90 |
| Charco da Candieira    | 12000 | 1188.84 | 1080.51 | 1318.47 | 237.96 | 60.70 |
| Golfo                  | 12000 | 1163.33 | 1071.49 | 1273.17 | 201.68 | 51.45 |
| Guadiana               | 12000 | 1138.34 | 1017.62 | 1294.77 | 277.15 | 70.70 |
| Lago de Ajo            | 12000 | 1242.32 | 1070.89 | 1408.55 | 337.66 | 86.14 |
| Laguna de la Roya      | 12000 | 1177.22 | 1057.34 | 1322.99 | 265.65 | 67.77 |
| Lake Racou             | 12000 | 1241.66 | 1103.39 | 1371.23 | 267.84 | 68.33 |
| Navarres 1             | 12000 | 1206.21 | 977.31  | 1341.95 | 364.64 | 93.02 |
| Quintanar de la Sierra | 12000 | 1208.03 | 1092.11 | 1345.41 | 253.30 | 64.62 |
| Sanabria Marsh         | 12000 | 1253.95 | 1108.80 | 1416.45 | 307.65 | 78.48 |
| San Rafael             | 12000 | 968.50  | 882.01  | 1055.91 | 173.90 | 44.36 |
| Santo Andre            | 12000 | 1098.49 | 957.07  | 1287.19 | 330.12 | 84.21 |
| Siles                  | 12000 | 938.75  | 852.29  | 1028.85 | 176.56 | 45.04 |
| Padul                  | 12000 | 1113.65 | 991.76  | 1224.53 | 232.77 | 59.38 |
| Lourdes                | 12000 | 1202.94 | 1059.55 | 1404.10 | 344.55 | 87.90 |
| Monge                  | 12000 | 1182.78 | 1038.64 | 1359.32 | 320.68 | 81.81 |
| Moura                  | 12000 | 1133.20 | 1002.73 | 1321.17 | 318.44 | 81.23 |
| Banyoles               | 12000 | 1135.31 | 1008.93 | 1292.15 | 283.22 | 72.25 |
| Charco da Candieira    | 13000 | 1155.33 | 1051.41 | 1277.72 | 226.31 | 57.73 |
| Golfo                  | 13000 | 1200.28 | 1094.73 | 1330.60 | 235.87 | 60.17 |
| Guadiana               | 13000 | 1125.34 | 992.94  | 1238.31 | 245.37 | 62.59 |
| Lago de Ajo            | 13000 | 1219.98 | 1069.10 | 1380.08 | 310.98 | 79.33 |
| Laguna de la Roya      | 13000 | 1184.10 | 1054.83 | 1343.11 | 288.28 | 73.54 |
| Navarres 1             | 13000 | 1217.01 | 983.21  | 1357.08 | 373.87 | 95.37 |
| Quintanar de la Sierra | 13000 | 1168.82 | 1050.43 | 1307.42 | 256.99 | 65.56 |
| Sanabria Marsh         | 13000 | 1268.53 | 1117.50 | 1434.47 | 316.97 | 80.86 |
| San Rafael             | 13000 | 1025.35 | 921.20  | 1150.57 | 229.37 | 58.51 |
| Santo Andre            | 13000 | 1111.35 | 961.51  | 1319.32 | 357.81 | 91.28 |
| Siles                  | 13000 | 1032.04 | 891.10  | 1136.37 | 245.27 | 62.57 |
| Padul                  | 13000 | 1139.08 | 1024.06 | 1276.36 | 252.30 | 64.36 |
| Lourdes                | 13000 | 1222.94 | 1084.73 | 1369.72 | 284.99 | 72.70 |
| Monge                  | 13000 | 1186.87 | 1054.79 | 1361.95 | 307.16 | 78.36 |

Table 3: *(continued)*

| site                   | age   | value   | lower   | upper   | range  | se    |
|------------------------|-------|---------|---------|---------|--------|-------|
| Banyoles               | 13000 | 1217.50 | 1082.67 | 1381.26 | 298.59 | 76.17 |
| Charco da Candieira    | 14000 | 1171.06 | 1022.12 | 1351.77 | 329.65 | 84.09 |
| Golfo                  | 14000 | 1228.99 | 1109.18 | 1373.68 | 264.50 | 67.47 |
| Lago de Ajo            | 14000 | 1190.10 | 1056.90 | 1354.99 | 298.09 | 76.04 |
| Laguna de la Roya      | 14000 | 1123.89 | 1007.92 | 1278.66 | 270.74 | 69.07 |
| Navarres 1             | 14000 | 1224.97 | 988.71  | 1370.43 | 381.72 | 97.38 |
| Quintanar de la Sierra | 14000 | 1210.14 | 1083.64 | 1366.91 | 283.27 | 72.26 |
| Sanabria Marsh         | 14000 | 1229.44 | 1091.68 | 1358.46 | 266.78 | 68.06 |
| San Rafael             | 14000 | 1000.22 | 892.06  | 1151.26 | 259.20 | 66.12 |
| Santo Andre            | 14000 | 1045.12 | 875.10  | 1238.52 | 363.42 | 92.71 |
| Siles                  | 14000 | 971.08  | 855.19  | 1096.65 | 241.46 | 61.60 |
| Padul                  | 14000 | 1097.28 | 989.86  | 1238.64 | 248.78 | 63.46 |
| Lourdes                | 14000 | 1171.41 | 1062.07 | 1328.41 | 266.34 | 67.94 |
| Monge                  | 14000 | 1148.99 | 1028.42 | 1318.21 | 289.79 | 73.93 |
| Banyoles               | 14000 | 1236.87 | 1099.59 | 1377.23 | 277.64 | 70.83 |
| Lago de Ajo            | 15000 | 1185.62 | 1047.75 | 1355.29 | 307.54 | 78.45 |
| Laguna de la Roya      | 15000 | 1136.99 | 1032.47 | 1294.89 | 262.42 | 66.94 |
| Navarres 1             | 15000 | 1230.68 | 993.89  | 1382.38 | 388.49 | 99.10 |
| Quintanar de la Sierra | 15000 | 1194.51 | 1083.30 | 1336.82 | 253.52 | 64.67 |
| San Rafael             | 15000 | 982.92  | 868.12  | 1142.07 | 273.95 | 69.89 |
| Santo Andre            | 15000 | 1123.83 | 936.46  | 1307.80 | 371.34 | 94.73 |
| Siles                  | 15000 | 981.45  | 892.56  | 1098.70 | 206.14 | 52.59 |
| Padul                  | 15000 | 1146.70 | 1021.48 | 1311.90 | 290.42 | 74.09 |
| Lourdes                | 15000 | 1186.16 | 1050.61 | 1355.36 | 304.75 | 77.74 |
| Banyoles               | 15000 | 1222.96 | 1091.02 | 1376.16 | 285.14 | 72.74 |
