# Supplementary material for: Spatial climate dynamics in the Iberian Peninsula since 15 000 yr BP
Source: Copernicus journal article supplement (doi:10.5194/cp-12-1137-2016), 2016-05-11
Supplement: Supplementary file 6 [file cp-12-1137-2016-supplement.zip › TableS1.pdf]

The taxa list used in the climate reconstruction and the conversion between pollen identified taxa and used taxa list.

| Pollen tyep                   | Used taxa                      |
|-------------------------------|--------------------------------|
| <i>Abies</i>                  | <i>Abies alba</i>              |
| <i>Acer</i>                   | <i>Acer</i>                    |
| <i>Acer campestre</i>         | <i>Acer campestre</i>          |
| <i>Acer pseudoplatanus</i>    | <i>Acer</i>                    |
| <i>Alchemilla</i>             | <i>Alchemilla</i>              |
| <i>Alnus</i>                  | <i>Alnus</i>                   |
| <i>Alnus glutinosa</i>        | <i>Alnus glutinosa</i>         |
| <i>Anemone</i>                | <i>Anemone</i>                 |
| <i>Anthemis</i>               | <i>Anthemis</i>                |
| <i>Arbutus unedo</i>          | <i>Arbutus unedo</i>           |
| <i>Arenaria serpyllifolia</i> | <i>Arenaria serpyllifolia</i>  |
| <i>Armeria maritima</i>       | <i>Armeria maritima</i>        |
| <i>Artemisia</i>              | <i>Artemisia herba-alba</i>    |
| <i>Artemisia herba-alba</i>   | <i>Artemisia herba-alba</i>    |
| <i>Asphodelus</i>             | <i>Asphodelus</i>              |
| Asteraceae                    | Compositae Subfam. Asteroideae |
| <i>Berberis</i>               | <i>Berberis</i>                |
| <i>Betula</i>                 | <i>Betula</i>                  |
| <i>Bidens</i>                 | <i>Bidens</i>                  |
| Brassicaceae                  | <i>Brassica</i>                |
| <i>Buxus</i>                  | <i>Buxus sempervirens</i>      |
| <i>Calluna</i>                | <i>Calluna vulgaris</i>        |
| <i>Calluna vulgaris</i>       | <i>Calluna vulgaris</i>        |
| <i>Calystegia sepium</i>      | <i>Calystegia sepium</i>       |
| <i>Campanula</i>              | <i>Campanula</i>               |
| <i>Carduus</i>                | <i>Carduus</i>                 |
| <i>Carpinus betulus</i>       | <i>Carpinus betulus</i>        |
| Caryophyllaceae               | Caryophyllaceae                |
| <i>Castanea</i>               | <i>Castanea</i>                |
| <i>Cedrus</i>                 | <i>Cedrus atlantica</i>        |
| <i>Centaurea</i>              | <i>Centaurea nigra</i>         |
| <i>Centaurea cyanus</i>       | <i>Centaurea cyanus</i>        |
| <i>Centaurea nigra</i>        | <i>Centaurea nigra</i>         |
| <i>Centaurea scabiosa</i>     | <i>Centaurea scabiosa</i>      |
| <i>Centaureum spicatum</i>    | <i>Centaureum spicatum</i>     |
| <i>Cerastium</i>              | <i>Cerastium</i>               |
| <i>Ceratonia siliqua</i>      | <i>Ceratonia siliqua</i>       |
| Chenopodiaceae                | Chenopodiaceae                 |
| <i>Chenopodium</i>            | <i>Chenopodium</i>             |
| <i>Cirsium</i>                | <i>Cirsium</i>                 |

| Pollen type                      | Used taxa                        |
|----------------------------------|----------------------------------|
| Cistaceae                        | <i>Cistus</i>                    |
| <i>Cistus</i>                    | <i>Cistus</i>                    |
| <i>Cistus albidus</i>            | <i>Cistus</i>                    |
| <i>Cistus monspeliensis</i>      | <i>Cistus</i>                    |
| <i>Cistus salvifolius</i>        | <i>Cistus</i>                    |
| <i>Cistus ladanifer</i>          | <i>Cistus</i>                    |
| Compositae Subfam. Cichorioideae | Compositae Subfam. Cichorioideae |
| <i>Convolvulus</i>               | <i>Convolvulus arvensis</i>      |
| <i>Cornus sanguinea</i>          | <i>Cornus sanguinea</i>          |
| <i>Corylus</i>                   | <i>Corylus avellana</i>          |
| <i>Crataegus</i>                 | <i>Crataegus</i>                 |
| Cruciferae                       | Cruciferae                       |
| Cupressaceae                     | Cupressaceae                     |
| <i>Daphne</i>                    | <i>Daphne</i>                    |
| <i>Empetrum</i>                  | <i>Empetrum nigrum</i>           |
| <i>Ephedra</i>                   | <i>Ephedra</i>                   |
| <i>Ephedra distachya</i>         | <i>Ephedra distachya</i>         |
| <i>Ephedra fragilis</i>          | <i>Ephedra fragilis</i>          |
| <i>Ephedra nebrodensis</i>       | <i>Ephedra</i>                   |
| <i>Epilobium</i>                 | <i>Epilobium</i>                 |
| <i>Erica</i>                     | <i>Erica arborea</i>             |
| <i>Erica arborea</i>             | <i>Erica arborea</i>             |
| <i>Erica australis</i>           | <i>Erica tetralix</i>            |
| <i>Erica cinerea</i>             | <i>Erica cinerea</i>             |
| <i>Erica erigena</i>             | <i>Erica cinerea</i>             |
| <i>Erica lusitanica</i>          | <i>Erica cinerea</i>             |
| <i>Erica scoparia</i>            | <i>Erica cinerea</i>             |
| <i>Erica tetralix</i>            | <i>Erica tetralix</i>            |
| <i>Erica umbellata</i>           | <i>Erica cinerea</i>             |
| <i>Ericales</i>                  | Ericaceae                        |
| <i>Eryngium</i>                  | Umbelliferae                     |
| <i>Euphorbia</i>                 | <i>Euphorbia</i>                 |
| <i>Fagus</i>                     | <i>Fagus sylvatica</i>           |
| <i>Filipendula</i>               | <i>Filipendula vulgaris</i>      |
| <i>Frangula alnus</i>            | <i>Frangula alnus</i>            |
| <i>Fraxinus</i>                  | <i>Fraxinus excelsior</i>        |
| <i>Galium</i>                    | <i>Galium</i>                    |
| <i>Genista</i>                   | <i>Genista</i>                   |
| <i>Genista ulx</i>               | <i>Genista</i>                   |
| Genisteae                        | <i>Genista</i>                   |

| Pollen type                      | Used taxa                        |
|----------------------------------|----------------------------------|
| <i>Gentiana</i>                  | <i>Gentiana nivalis</i>          |
| <i>Geranium</i>                  | <i>Geranium</i>                  |
| <i>Geum</i>                      | <i>Geum</i>                      |
| Graminea                         | Gramineae                        |
| <i>Hedera</i>                    | <i>Hedera helix</i>              |
| <i>Hedera helix</i>              | <i>Hedera helix</i>              |
| <i>Helianthemum</i>              | <i>Helianthemum</i>              |
| <i>Helianthemum croceum</i>      | <i>Helianthemum</i>              |
| <i>Helianthemum salicifolium</i> | <i>Helianthemum</i>              |
| <i>Hippophae</i>                 | <i>Hippophae rhamnoides</i>      |
| <i>Hypericum elodes</i>          | <i>Hypericum</i>                 |
| <i>Hypericum perforatum</i>      | <i>Hypericum</i>                 |
| <i>Ilex</i>                      | <i>Ilex aquifolium</i>           |
| <i>Ilex aquifolium</i>           | <i>Ilex aquifolium</i>           |
| <i>Jasione</i>                   | <i>Jasione montana</i>           |
| <i>Jasione montana</i>           | <i>Jasione montana</i>           |
| <i>Juglans</i>                   | <i>Juglans</i>                   |
| <i>Juglans regia</i>             | <i>Juglans</i>                   |
| <i>Juniperus</i>                 | <i>Juniperus</i>                 |
| <i>Juniperus communis</i>        | <i>Juniperus communis</i>        |
| <i>Juniperus oxycedrus</i>       | <i>Juniperus oxycedrus</i>       |
| <i>Knautia</i>                   | <i>Knautia arvensis</i>          |
| <i>Lamium</i>                    | Lamiaceae                        |
| <i>Larix</i>                     | <i>Larix</i>                     |
| Liguliflorae                     | Compositae Subfam. Cichorioideae |
| <i>Ligustrum vulgare</i>         | <i>Ligustrum vulgare</i>         |
| <i>Lonicera</i>                  | <i>Lonicera</i>                  |
| <i>Lysimachia</i>                | <i>Lysimachia</i>                |
| <i>Lythrum</i>                   | <i>Lythrum portula</i>           |
| <i>Lythrum salicaria</i>         | <i>Lythrum portula</i>           |
| <i>Melampyrum</i>                | <i>Melampyrum</i>                |
| <i>Myrica</i>                    | <i>Myrica</i>                    |
| <i>Myrtus</i>                    | <i>Myrtus</i>                    |
| <i>Olea</i>                      | <i>Olea europaea</i>             |
| <i>Ostrya</i>                    | <i>Ostrya</i>                    |
| Papaveraceae                     | Papaveraceae                     |
| <i>Paronychia</i>                | <i>Paronychia</i>                |
| <i>Pedicularis</i>               | <i>Pedicularis</i>               |
| <i>Phillyrea</i>                 | <i>Phillyrea</i>                 |
| <i>Picea</i>                     | <i>Picea abies</i>               |

| Pollen type                    | Used taxa                   |
|--------------------------------|-----------------------------|
| <i>Pinus</i>                   | <i>Pinus</i>                |
| <i>Pinus halepensis</i>        | <i>Pinus halepensis</i>     |
| <i>Pinus nigra</i>             | <i>Pinus</i>                |
| <i>Pinus pinaster</i>          | <i>Pinus pinaster</i>       |
| <i>Pinus pinea</i>             | <i>Pinus pinaster</i>       |
| <i>Pinus sylvestris</i>        | <i>Pinus sylvestris</i>     |
| <i>Pistacia</i>                | <i>Pistacia</i>             |
| <i>Plantago</i>                | <i>Plantago</i>             |
| <i>Plantago albicans</i>       | <i>Plantago</i>             |
| <i>Plantago alpina</i>         | <i>Plantago</i>             |
| <i>Plantago coronopus</i>      | <i>Plantago</i>             |
| <i>Plantago lanceolata</i>     | <i>Plantago lanceolata</i>  |
| <i>Plantago major</i>          | <i>Plantago major</i>       |
| <i>Plantago maritima</i>       | <i>Plantago</i>             |
| <i>Plantago media</i>          | <i>Plantago</i>             |
| <i>Polygala</i>                | <i>Polygala</i>             |
| Polygonaceae                   | Polygonaceae                |
| <i>Polygonum</i>               | <i>Polygonum</i>            |
| <i>Polygonum amphibium</i>     | <i>Polygonum amphibium</i>  |
| <i>Polygonum aviculare</i>     | <i>Polygonum aviculare</i>  |
| <i>Polygonum bistorta</i>      | <i>Polygonum bistorta</i>   |
| <i>Polygonum persicaria</i>    | <i>Polygonum persicaria</i> |
| <i>Populus</i>                 | <i>Populus</i>              |
| <i>Potentilla</i>              | <i>Potentilla</i>           |
| <i>Prunus</i>                  | <i>Prunus</i>               |
| <i>Quercus</i>                 | <i>Quercus</i>              |
| <i>Quercus coccifera</i>       | <i>Quercus coccifera</i>    |
| <i>Quercus</i> (deciduous)     | <i>Quercus robur</i>        |
| <i>Quercus</i> (evergreen)     | <i>Quercus ilex</i>         |
| <i>Quercus ilex</i>            | <i>Quercus ilex</i>         |
| <i>Quercus robur</i>           | <i>Quercus robur</i>        |
| <i>Quercus suber</i>           | <i>Quercus suber</i>        |
| Ranunculaceae                  | Ranunculaceae               |
| <i>Ranunculus</i>              | <i>Ranunculus</i>           |
| <i>Ranunculus batrachoides</i> | <i>Ranunculus</i>           |
| <i>Rhamnus</i>                 | <i>Rhamnus catharticus</i>  |
| <i>Rubus</i>                   | <i>Rubus</i>                |
| <i>Rumex</i>                   | <i>Rumex</i>                |
| <i>Rumex acetosella</i>        | <i>Rumex acetosella</i>     |
| <i>Rumex crispus</i>           | <i>Rumex</i>                |

| Pollen tyep                    | Used taxa                        |
|--------------------------------|----------------------------------|
| <i>Salix</i>                   | <i>Salix</i>                     |
| <i>Sambucus ebulus</i>         | <i>Sambucus</i>                  |
| <i>Sanguisorba</i>             | <i>Sanguisorba minor</i>         |
| <i>Sanguisorba minor</i>       | <i>Sanguisorba minor</i>         |
| <i>Sanguisorba officinalis</i> | <i>Sanguisorba officinalis</i>   |
| <i>Taraxacum</i>               | Compositae Subfam. Cichorioideae |
| <i>Saxifraga</i>               | <i>Saxifraga</i>                 |
| <i>Saxifraga stellaris</i>     | <i>Saxifraga</i>                 |
| <i>Scleranthus</i>             | <i>Scleranthus</i>               |
| <i>Sedum</i>                   | <i>Sedum</i>                     |
| <i>Senecio</i>                 | Compositae Subfam. Cichorioideae |
| <i>Sorbus</i>                  | <i>Sorbus</i>                    |
| <i>Spergula</i>                | <i>Spergula</i>                  |
| <i>Stachys</i>                 | <i>Stachys</i>                   |
| <i>Stellaria</i>               | <i>Stellaria</i>                 |
| <i>Taxus</i>                   | <i>Taxus</i>                     |
| <i>Taxus baccata</i>           | <i>Taxus baccata</i>             |
| <i>Thalictrum</i>              | <i>Thalictrum</i>                |
| <i>Tilia</i>                   | <i>Tilia</i>                     |
| <i>Trifolium</i>               | <i>Trifolium</i>                 |
| <i>Ulex</i>                    | <i>Ulex</i>                      |
| <i>Ulmus</i>                   | <i>Ulmus</i>                     |
| Umbelliferae                   | Umbelliferae                     |
| <i>Urtica</i>                  | <i>Urtica</i>                    |
| <i>Vaccinium</i>               | <i>Vaccinium</i>                 |
| <i>Viburnum tinus</i>          | <i>Viburnum</i>                  |
| <i>Ziziphus</i>                | <i>Ziziphus</i>                  |
